# Supplementary material
Source: HighWire-hosted journal article supplement (doi:10.1101/rna.080791.125)
Supplement: Supplemental_Legends.docx [file Supplemental_Legends.docx]

Supplemental Figure S1. Yeast three-hybrid reporter genes. A schematic showing transcriptional activation of the *lacZ* and *HIS3* reporters in yeast as a result of binding to the MS2-RPR1-NRE hybrid RNA by a Pum-HA-AD fusion protein. The remaining hybrid, LexA-MS2 CP (coat protein), tethers all three hybrids upstream of the reporter genes.

Supplemental Figure S2. Schematic workflow of the screens for NRE-binding variants of PUF repeats R6 and R5. Isolation and subsequent analysis of the repeat R6 NS variant is shown as an example. Individual colonies were screened by re-streaking rather than selection by plating directly on -UL + 3AT plates, to avoid discriminating against slow-growing transformants.

Supplemental Table S1. Quantitation of Western blots. Source data for measurements of protein levels described throughout this work.

Supplemental Table S2. Summary of yeast screens to identify Pum (NTR+RBD) variants that bind to various NREs. (Tab 1) For each NRE "bait" in column two, the table indicates the number of colonies tested by replica streaking, the number of these that grew in the presence of 1 mM 3-aminotriazole (3-AT), the number for which beta-galactosidase activity was measured, the number for which beta-galactosidase was ≥ 20% of the contemporaneously measured reference value (wild type protein binding to the wild type RNA), the number sequenced and for which unambiguous sequence was determined (i.e., cultures not bearing a mixture of plasmids), the number of unique amino acid combinations recovered, and the extrapolated frequency of positives in the library (product of the fraction of colonies with positive beta-galactosidase measurements times the fraction of colonies that grew on 3-AT). Restriction enzyme mapping and sequence determination of a small number of randomly selected plasmids from each library suggests that approximately 80% of each encode a *pum* gene fragment with the desired structure (i.e., no rearrangements in flanking positions and substitutions only at the targeted codons). (Tab 2) DNA sequences of the modified *pum* genes, the oligonucleotide pairs inserted to generate the R6 and R5 libraries, and PCR primers.

Supplemental Table S3. Source data with beta-galactosidase measurements of RNA-binding activity for all PUF repeat R6 variants in this work.

Supplemental Table S4. Source data with beta-galactosidase measurements of RNA-binding activity for all PUF repeat R5 variants in this work.
