# Supplementary material
Source: HighWire-hosted journal article supplement (doi:10.1101/rna.080791.125)
Supplement: Supplemental_Table_S1.xlsx [file Supplemental_Table_S1.xlsx]

## Sheet: 1 wt NTR+RBD vs. wt RBD
wt Dm Pum (NTR + RBD) vs. RBD-only
	RBD	RpL3	normalized RBD	NTR + RBD	RpL3	normalized NTR + RBD
sample #1	9217	11310	0.814943	6983	8106	0.861461
sample #2	7109	10610	0.670028	10280	9108	1.12868
sample #3	6053	10770	0.562024	13180	11840	1.11318
sample #4	6579	15420	0.426654	17520	13100	1.3374
sample #5	11540	14710	0.7845	8631	11850	0.728354
sample #6	8365	14330	0.58374	10840	14300	0.758042
		Avg =	0.640315		Avg =	0.987853
		St Dev =	0.146389		St Dev =	0.242426
		CV=	0.22862		CV=	0.245407
		Relative level	1		Relative level	1.54276
					p-value	0.013
(Fig. 1)

## Sheet: 2 R6 wt, NT-Y, NT-W (+NTR)
Dm Pum wt vs. R6 NT/Y vs. R6 NT/W
all proteins (NTR + RBD)
	wt	RpL3	normalized wt	R6 NT/Y	RpL3	normalized R6 NT/Y	R6 NT/W	RpL3	normalized R6 NT/W
sample #1	10500	6220	1.6881	11900	8630	1.37891	16540	10280	1.60895
sample #2	12420	9608	1.29267	15870	12350	1.28502	16030	10310	1.5548
sample #3	16100	11770	1.36788	12050	8928	1.34969	13870	10740	1.29143
sample #4	18920	8488	2.22903	11940	10250	1.16488	13490	8234	1.63833
		Avg =	1.64442		Avg =	1.29462		Avg =	1.52338
		St Dev =	0.425783		St Dev =	0.0949778		St Dev =	0.158453
		CV=	0.258926			0.0733633			0.104014
											NT/W : NT/Y
		Relative level	1		Relative level	0.787293			0.926404		1.1767
					p-value vs wt	0.1607			0.615
								p-value vs NT/Y	0.0478
(Figures 2 & 7)

## Sheet: 3 R6 wt, NT-Y, NT-W (-NTR)
Dm Pum wt vs. R6 NT/Y vs. R6 NT/W
all proteins RBD-only
	wt	RpL3	normalized wt	R6 NT/Y	RpL3	normalized R6 NT/Y	R6 NT/W	RpL3	normalized R6 NT/W
sample #1	34690	27900	1.24337	32250	27900	1.15591	20790	21500	0.966977
sample #2	29470	20290	1.45244	17960	22120	0.811935	18050	12850	1.40467
sample #3	28300	18550	1.52561	20210	14900	1.35638	19290	11850	1.62785
	24290	20860	1.16443	22800	25820	0.883036	16990	16200	1.04877
		Avg =	1.34646		Avg =	1.05182		Avg =	1.26206
		St Dev =	0.17038		St Dev =	0.251411		St Dev =	0.309142
		Relative level	1		Relative level	0.781171		Relative level	0.937321
					p-values
					vs. wt Pum	0.1004			0.648
								p-value
								vs. NT/Y	0.33
(Figures 2 & 7)

## Sheet: 4 R5 wt, GG, RG (+NTR)
Dm Pum wt vs. R5 GG , R5 RG
all proteins (NTR+RBD)
	wt	RpL3	normalized wt	R5 GG	RpL3	normalized R5 GG	R5 RG	RpL3	normalized R5 RG
	9305	17720	0.525113	4298	13950	0.3081	6645	18030	0.368552
	8531	17030	0.50094	5144	14860	0.346164	8911	16760	0.531683
	6203	15880	0.390617	4208	15000	0.280533	4806	15540	0.309266
				4292	14440	0.29723	4782	18450	0.259187
		Avg =	0.472223		Avg =	0.308007		Avg =	0.367172
		St Dev =	0.071699		St Dev =	0.0278504		St Dev =	0.118433
		Relative level	1		Relative level	0.652253		Relative level	0.777545
					p-value	0.007			0.238
					vs wt
								p-value	0.402
								vs GG
(Figure 3)

## Sheet: 5 R5 wt, GG, RG (-NTR)
Dm Pum wt vs. R5 GG , R5 RG
all proteins RBD-only
	wt	RpL3	normalized wt	R5 GG	RpL3	normalized R5 GG	R5 RG	RpL3	normalized R5 RG
sample #1	25760	19740	1.30496	7944	17450	0.455244	14890	16960	0.877948
sample #2	18150	16210	1.11968	11380	15380	0.739922	5903	15500	0.380839
sample #3	19430	16140	1.20384	9601	15780	0.608428	6685	15900	0.42044
sample #4	22960	18880	1.2161	11210	15200	0.7375	10090	18040	0.559313
		Avg =	1.21115		Avg =	0.635273		Avg =	0.559635
		St Dev =	0.07582		St Dev =	0.134825		St Dev =	0.225586
		CV=	0.0626018			0.212231			0.403094
		Relative level	1		Relative level	0.524543		Relative level	0.462088
					p-value vs wt	0.0003			0.000154
								p-value	0.5898
(Figure 3)								vs GG

## Sheet: 6 R6 wt, CR, VH, SD
Dm Pum wt vs. R6 CR, VH, & SD
all proteins (NTR+RBD)
with Tyr as interpolating residue
	wt Pum	RpL3	normalized wt Pum	R6 CR/Y	RpL3	normalized R6 CR/Y	R6 VH/Y	RpL3	normalized R6 VH/Y	R6 SD/y	RpL3	normalized R6 SD/Y
sample #1	13420	5893	2.27728	11390	4601	2.47555	7708	3876	1.98865	5208	4202	1.23941
sample #2	6636	3160	2.1	6001	3207	1.87122	4571	2489	1.83648	4885	3591	1.36035
sample #3	10570	3798	2.78304	6364	5143	1.23741	5781	4488	1.2881	9638	5635	1.71038
		Avg =	2.38677		Avg =	1.86139		Avg =	1.70441		Avg =	1.43671
		St Dev =	0.354442		St Dev =	0.619128		St Dev =	0.368474		St Dev =	0.244597
		Relative level	1		Relative level	0.779879		Relative level	0.714107		Relative level	0.601948
					p-values	0.2697			0.0832			0.0188
					vs. wt Pum
(Fig. 4)

## Sheet: 7 R6 VL, GR
Dm Pum wt vs. R6 VL, R6 GR
all proteins (NTR+RBD)
with Tyr as interpolating residue
	wt Pum	RpL3	normalized wt	R6 VL/Y	RpL3	normalized R6 VL/Y	R6 GR/Y	RpL3	normalized R6 GR/Y
sample #1	7445	5696	1.30706	7413	6420	1.15467	7626	8919	0.855029
sample #2	5921	5119	1.15667	5116	5494	0.931198	7080	5137	1.37824
sample #3	6729	6575	1.02342	11110	4650	2.38925	6265	5249	1.19356
sample #4	7462	4642	1.6075	13050	5704	2.28787	10080	4625	2.17946
		Avg =	1.27366		Avg =	1.69075		Avg =	1.40157
		St Dev =	0.25091		St Dev =	0.754707		St Dev =	0.56203
		CV =	0.196999			0.446375			0.401
		Relative level	1		Relative level	1.32747		Relative level	1.10043
				p-values	vs. wt	0.334			0.689
(Fig. 4)

## Sheet: 8 R6 wt,SD-Y, SD-R
Fig 5
Dm Pum wt vs. R6 SD/Y , R6 SD/R
all proteins (NTR+RBD)
	wt Pum	RpL3	normalized wt	SD / Y	RpL3	normalized SD/Y	SD/R	RpL3	normalized SD/R
sample #1	7344	4660	1.57597	5843	5071	1.15224	1576	3180
sample #2	5732	4297	1.33395	6086	6128	0.993146	10720	4795	2.23566
sample #3	5754	5899	0.97542	7711	4367	1.76574	9853	6173	1.59614
sample #4	8772	5347	1.64055	13460	6029	2.23254	12050	6742	1.7873
		Avg =	1.38147		Avg =	1.53592		Avg =	1.87304
		St Dev =	0.301155		St Dev =	0.571523		St Dev =	0.328266
		CV =	0.217996			0.372106			0.175259
		Relative level	1		Relative level	1.1118		Relative level	1.35583
				p-values	vs. wt	0.648			0.0944
								vs. SD/Y	0.4094
(Fig. 4)

## Sheet: 9 R6 wt ,SE-Y, SE-R
Dm Pum wt vs. R6 SE/Y , R6 SE/R
all proteins (NTR+RBD)
	wt Pum	RpL3	normalized wt	SE / Y	RpL3	normalized SE/Y	SE/R	RpL3	normalized SE/R
sample #1	7494	3838	1.95258	10570	4114	2.56928	7771	4834	1.60757
sample #2	6734	4336	1.55304	7748	3385	2.28892	7942	3600	2.20611
sample #3	7763	4652	1.66874	9149	3639	2.51415	13190	4735	2.78564
sample #4	7758	4193	1.85023	16860	6194	2.72199	8190	5754	1.42336
		Avg =	1.75615		Avg =	2.52358		Avg =	2.00567
		St Dev =	0.179189		St Dev =	0.179451		St Dev =	0.618088
		CV =	0.102035			0.0711094			0.30817
		Relative level	1		Relative level	1.43712		Relative level	1.14218
				p-values	vs. wt	0.00092			0.48
								vs. SE/Y	0.18
(Fig. 4)

## Sheet: 10 R5 SD, SE (- vs + NTR)
Fig 7
Dm Pum R5 SD, SE; with vs. without NTR
	R5 SD RBD	RpL3	normalized R5 SD RBD	R5 SD (NTR+RBD)	RpL3	normalized R5 SD (NTR+RBD)	R5 SE RBD	RpL3	normalized R5 SE RBD	R5 SE (NTR+RBD)	RpL3	normalized R5 SE (NTR+RBD)
sample #1	10430	14959	0.697239	11920	13380	0.890882	11240	17110	0.656926	12850	12820	1.00234
sample #2	9368	15390	0.608707	11500	13240	0.86858	14850	14900	0.996644	11380	12290	0.925956
sample #3	16000	16400	0.97561	11910	12140	0.981054	7748	9511	0.814636	17220	14060	1.22475
		Avg =	0.760519		Avg =	0.913505		Avg =	0.822735		Avg =	1.05102
		St Dev =	0.191462		St Dev =	0.0595524		St Dev =	0.170004		St Dev =	0.155231
		Relative level	1		Relative level	1.20119		Relative level	1.08183		Relative level	1.38201
					p-values	0.257			0.696			0.11
					vs. SD RBD
								p-values	0.433			0.226
(Fig. 6)								vs. SD (NTR + RBD)
											p-values	0.16055
											vs. SE RBD

[truncated: 2 more sheets: 11 R5 wt, SD, SE (+NTR), 12 R5 wt, SD, SE (-NTR)]
