# Supplementary material
Source: HighWire-hosted journal article supplement (doi:10.1101/rna.080791.125)
Supplement: Supplemental_Table_S2.xlsx [file Supplemental_Table_S2.xlsx]

## Sheet: 1 Summary of  R6 and R5 screens
	RNA	colonies tested	growth on 1mM 3AT	beta-gal assay	positive beta-gal	sequenced	unambiguous seq	unique AA combinations	extrapolated % positives in library
R6 screens	3U	1000	104	93	32	32	18	8	3.57849
	3C	850	24	22	5	5	3	1	0.641711
	3A	500	6	6	0	0	0	0	0
	3G	500	7	7	4	4	0	0	0.8
R6 Total :		2850	141	128	41	41	21	9	1.5847
R5 screens	RNA	colonies tested	growth on 1mM 3AT	beta-gal assay	positive beta-gal	sequenced	unambiguous seq	unique AA combinations	extrapolated % positives in library
	4A	524	255	228	192	24	20	13	40.9803
	4G	700	206	53	40	24	18	15	22.2102
	4U	700	201	48	36	20	16	7	21.5357
	4C	600	73	73	67	19	9	5	11.1667
R5 Total:		2524	735	402	335	87	63	40	24.267

## Sheet: 2 DNA sequences
DmPum R6 recipient	… att ttg gac GAG CTC cat gag cAC TAG Taa aat gtT CTA GAa cac ggc aag ...	flanking cleavage sites for SacI and XbaI in bold upper case
		internal cleavage site for SpeI in red (note: in-frame stop codon)
DmPum R6 library	… att ttg gac GAG CTC CAT GAG CAC ACC GAA CAG TTG ATT CAG GAC CAA TAc GGC NNN TAc GTg ATc NNN CAT GTT CTA GAa cac ggc aag …	codons for edge-on residues in red
		flanking sites for SacI and XbaI in bold
		flanking wt Pum sequence in lower case
		internal silent third position changes to increase
		G-C content in lower case bold
		N = equimolar G, A, T, C
DmPum R5 recipient	… agc acc cat cCG TAC Gga tgc cgg act agA CTA Gta g aGA ATT Ctt gag cat tgc …	flanking cleavage sites for BsiWI and EcoRI in bold upper case
		internal cleavage site for SpeI in red
		note: reading frameshift downtream of SpeI
DmPum R5 library	… agc acc cat cCG TAC Gga NNN CGG GTG ATC NNN AGA ATT Ctt gag cat tgc …	flanking sites for BsiWI and EcoRI in bold upper case
		flanking wt Pum sequence in lower case
		N = equimolar G, A, T, C
PCR forward primer	GCCTATAGCCTGATGACCGATGTC
PCR reverse primer	CATTTCTCCACAACGTTTGAGGCG
Hs Pum1 R5 recipient	… tcc aca cat cCG TAC Ggc tgc cga gtg att cag aGA ATT Ctg gag cac tgt …	flanking cleavage sites for BsiWI and EcoRI in bold upper case
Hs Pum2 R5 recipient	… tca act cat cCG TAC Ggc tgc aga gta att cag cGA ATT Cta gag cat tgc …	flanking cleavage sites for BsiWI and EcoRI in bold upper case
