# Supplementary material
Source: HighWire-hosted journal article supplement (doi:10.1101/rna.080791.125)
Supplement: Supplemental_Table_S3.xlsx [file Supplemental_Table_S3.xlsx]

## Sheet: 1 Fig 2 R6 mutants NTR+RBD
beta-galactosidase measurements from three-hybrid RNA-binding experiments
all proteins (NTR + RBD)
												= variant in Hs Pum1
	3U	3C	3A	3G
wt	20699.9	131.68	99.2124	156.457		contemporaneous wt
(NQ)	20013.1	124.321	96.4159	153.583		for NS , NN . HQ , QR
	27219.7	122.037	99.3632	150.408
		139.874	96.1441	148.354
avg	22644.2	129.478	97.7839	152.201
stdev	3977.32	8.06032	1.74119	3.56053
as % of wt : 3U	91.4143	0.581523	0.43814	0.69094
	88.3816	0.549022	0.42579	0.678252
	120.207	0.538936	0.438806	0.66423
		0.617711	0.42459	0.655159
avg	100.001	0.571798	0.431831	0.672145
stdev	17.5645	0.0355958	0.00768942	0.0157239
NS	21963	95.1099	90.4182	155.829
	20722.4	118.428	86.9148	149.943
	17566.5	120.39	89.1462	130.829
	18019.5	106.205	93.4498	139.869
avg	19567.8	110.033	89.9822	144.117
stdev	2119.14	11.763	2.72775	11.0411
as % of wt : 3U	96.9924	0.420022	0.399303	0.688168
	91.5139	0.522999	0.383831	0.662174
	77.5769	0.531665	0.393686	0.577765
	79.5773	0.469019	0.412691	0.617686
avg	86.4151	0.485926	0.397378	0.636448
stdev	9.35852	0.0519473	0.0120462	0.0487593
NN	14872.5	108.706	61.0804	120.419
	10626.2	125.864	84.964	138.191
	18423.4	122.253	83.7864	132.318
	15232.1	140.647	73.5654	128.82
avg	14788.6	124.367	75.849	129.937
stdev	3201.12	13.1276	11.0967	7.43038
as % of wt : 3U	65.6799	0.480065	0.269742	0.531793
	46.9271	0.55584	0.375216	0.610275
	81.3611	0.539892	0.370016	0.584341
	67.2678	0.62112	0.324878	0.568891
avg	65.309	0.549229	0.334963	0.573825
stdev	14.1367	0.057974	0.049005	0.0328139
HQ	6006.2	512.401	139.328	129.587
	7610.38	340.801	147.071	122.098
	7202.31	514.638	141.803	140.493
	7285.41	656.801	144.991	122.165
avg	7026.07	506.16	143.298	128.586
stdev	702.346	129.289	3.42044	8.68164
as % of wt : 3U	26.5245	2.26286	0.615296	0.572279
	33.6088	1.50504	0.649491	0.539207
	31.8067	2.27273	0.626228	0.620444
	32.1737	2.90055	0.640308	0.539501
avg	31.0284	2.23529	0.632831	0.567858
stdev	3.10169	0.570965	0.0151053	0.0383397
p-value U vs. C	0.000358
QR	5054.86	1616.53	87.1814	122.996
	5606.98	1947.41	78.7881	114.464
	5759.65	1897.73	74.2043	139.377
	5710.12	1603.08	77.8866	134.163
avg	5532.9	1766.19	79.5151	127.75
stdev	324.978	181.793	5.482	11.1867
as % of wt : 3U	22.3232	7.13888	0.385009	0.543172
	24.7615	8.60011	0.347943	0.505493
	25.4357	8.38071	0.3277	0.615513
	25.2169	7.0795	0.343961	0.592486
avg	24.4343	7.7998	0.351153	0.564166
stdev	1.43516	0.80283	0.0242095	0.0494025
p-value U vs. C	<0.0001
								3U	3C	3A	3G
HE	21311.1	3155.18	2280.8	211.852		contemporaneous wt	wt	23768.2	218.116	145.644	171.413
	21638.7	2810.03	2699.4	222.684		for HE , SR		28164.4	173.047	165.199	166.043
	20594.3	3292.9	3131.55	208.321				27473.8	187.826	132.718	169.291
	18059.2	3346.03	3401.12	231.946				26071.3	159.432	136.064	159.224
avg	20400.8	3151.03	2878.22	218.701			avg	26369.4	184.605	144.906	166.493
stdev	1620.88	241.144	492.101	10.7385			stdev	1940.5	25.1705	14.5955	5.32516
as % of wt : 3U	80.8186	11.9655	8.64954	0.803413			as % of wt : 3U	90.137	0.82717	0.552329	0.650054
	82.0612	10.6566	10.237	0.844492				106.809	0.656252	0.62649	0.62969
	78.1005	12.4878	11.8759	0.790022				104.19	0.7123	0.503311	0.642007
	68.4863	12.6892	12.8982	0.879615				98.8709	0.604619	0.515999	0.603831
avg	77.3667	11.9498	10.9151	0.829385			avg	100.002	0.700085	0.549532	0.631395
stdev	6.14691	0.914497	1.86621	0.040724			stdev	7.35903	0.0954547	0.0553511	0.0201948
p-value U vs. C	0.000234
p-value U vs. A	<0.0001
p-value C vs. A	0.3559
SR	2263.13	7209.81	81.3066	168.269								X
	1747.96	5667.51	73.3616	115.598
	1853.5	6721.46	80.6926	141.599
	1950.91	6676.2	81.9141	143.116
avg	1953.88	6568.75	79.3187	142.145
stdev	222.204	647.577	4.00258	21.5133
as % of wt : 3U	8.58254	27.342	0.308341	0.638132
	6.62884	21.4931	0.278212	0.438385
	7.02909	25.49	0.306013	0.53699
	7.39851	25.3184	0.310645	0.542744
avg	7.40975	24.9109	0.300803	0.539063
stdev	0.84267	2.45583	0.0151791	0.0815857
p-value U vs. C	<0.0001
								3U	3C	3A	3G
NT	24767.9	208.565	98.4229	168.159		contemporaneous wt	wt	30598.6	206.516	152.867	202.753
	21929.8	156.393	91.2103	185.427		for NT , NR		28800.6	201.336	158.95	202.575
	26099.4	165.004	91.4247	183.886				30116.3	196.835	142.833	198.893
	28971.3	172.082	92.3311	178.09				29700.9	193.378	155.613	195.526
avg	25442.1	175.511	93.3473	178.891			avg	29804.1	199.516	152.566	199.937
stdev	2925.63	22.9508	3.41847	7.82047			stdev	762.938	5.69158	6.949	3.43713
as % of wt : 3U	83.1026	0.699789	0.330234	0.564217			as % of wt : 3U	102.666	0.692915	0.512907	0.680287
	73.5802	0.524739	0.306034	0.622154				96.6335	0.675533	0.533316	0.679692
	87.57	0.55363	0.306753	0.616986				101.048	0.66043	0.47924	0.667336
	97.2062	0.57738	0.309794	0.597538				99.6539	0.648833	0.522122	0.656038
avg	85.3647	0.588884	0.313204	0.600224			avg	100	0.669428	0.511896	0.670838
stdev	9.81625	0.0770057	0.0114698	0.0262397			stdev	2.55985	0.0190967	0.0233157	0.0115324
NR	20896	9299.69	111.615	184.94
	19642.6	9174.91	100.849	182.153
	23178.8	7303	108.804	176.393
	25675.3	9736.01	103.491	168.989
avg	22348.2	8878.4	106.19	178.119
stdev	2657.59	1077.47	4.90142	7.05038
as % of wt : 3U	70.1115	31.2028	0.374498	0.62052
	65.906	30.7841	0.338375	0.611169
	77.7708	24.5034	0.365064	0.591844
	86.1471	32.6668	0.34724	0.567002
avg	74.9838	29.7893	0.356294	0.597634
stdev	8.91688	3.61517	0.0164455	0.0236558
p-value U vs. C	<0.0001
								3U	3C	3A	3G
NK	12737.2	133.054	79.1286	116.672		contemporaneous wt	wt	20699.9	131.68	99.2124	156.457
	9752.56	149.212	76.9368	140.404		for NK		20013.1	124.321	96.4159	153.583
	13484.6	142.662	91.1502	116.88				27219.7	122.037	99.3632	150.408
	11160	129.33	78.2636	113.619					139.874	96.1441	148.354
avg	11783.6	138.564	81.3698	121.894			avg	22644.2	129.478	97.7839	152.201
stdev	1665	9.05181	6.5823	12.4298			stdev	3977.32	8.06032	1.74119	3.56053
as % of wt : 3U	56.2497	0.587589	0.349446	0.515244			as % of wt : 3U	91.4143	0.581523	0.43814	0.69094
	43.0691	0.658947	0.339767	0.620048				88.3816	0.549022	0.42579	0.678252
	59.5503	0.630019	0.402536	0.516165				120.207	0.538936	0.438806	0.66423
	49.2844	0.571143	0.345626	0.501761					0.617711	0.42459	0.655159
avg	52.0384	0.611924	0.359344	0.538304			avg	100.001	0.571798	0.431831	0.672145
stdev	7.35296	0.0399744	0.0290686	0.054892			stdev	17.5645	0.0355958	0.00768942	0.0157239
(Fig 2)

## Sheet: 2 Fig 2 R6 mutants RBD
beta-galactosidase measurements from three-hybrid RNA-binding experiments
all proteins RBD-only
					= variant in Hs Pum1
	3U	3C	3A	3G
wt	15841.3	146.381	90.8475	132.593		contemporaneous wt
	17018.5	150.196	85.6722	127.477		for NS , NN , HQ , QR
	16532.6	140.239	81.9378	143.498
	17986	112.985	96.0776	114.532
avg	16844.6	137.45	88.6338	129.525
stdev	901.289	16.8178	6.1622	12.0228
as % of wt : 3U	94.0418	0.868989	0.539314	0.787137
	101.03	0.891634	0.508591	0.756762
	98.1453	0.832527	0.486422	0.851872
	106.774	0.670736	0.570363	0.679916
avg	99.9977	0.815971	0.526172	0.768922
stdev	5.35048	0.0998386	0.0365818	0.0713733
NS	3531.93	134.059	81.8017	150.543
	3010.6	132.61	76.9046	136.592
	3418.05	106.558	77.687	79.5718
		204.874	80.0174	128.574
avg	3320.19	144.525	79.1027	123.82
stdev	274.091	42.1703	2.23288	30.864
as % of wt : 3U	20.9685	0.795887	0.485643	0.893751
	17.8735	0.787283	0.45657	0.810921
	20.2924	0.632616	0.461215	0.472405
		1.2163	0.47505	0.763323
avg	19.7114	0.858022	0.469619	0.7351
stdev	1.62723	0.250358	0.0132562	0.183234
NN	2332.76	133.484	84.8347	151.972
	2551.19	126.875	97.4455	122.44
	3178.51	148.48	82.9835	127.311
	2661.58	87.7143	84.7928	128.664
avg	2681.01	124.138	87.5141	132.597
stdev	358.709	25.9104	6.67692	13.1905
as % of wt : 3U	13.8484	0.792426	0.50362	0.902179
	15.1451	0.753188	0.578483	0.726863
	18.8692	0.881447	0.49263	0.755779
	15.8004	0.520714	0.503371	0.763812
avg	15.9158	0.736944	0.519526	0.787158
stdev	2.12947	0.153816	0.0396374	0.0783049
HQ	382.578	136.442	84.0504	127.681
	450.158	134.078	80.2906	130.681
	443.219	150.988	76.153	96.43
	376.697	152.722	79.4368	120.45
avg	413.163	143.557	79.9827	118.811
stdev	38.8893	9.65541	3.2458	15.5261
as % of wt : 3U	2.27116	0.809983	0.498963	0.757975
	2.67235	0.795954	0.476643	0.775788
	2.63116	0.896338	0.452081	0.572455
	2.23626	0.906628	0.471575	0.715049
avg	2.45273	0.852226	0.474816	0.705317
stdev	0.230866	0.0573192	0.0192686	0.0921702
QR	269.095	224.668	75.1042	134.643
	300.177	192.985	76.5958	112.4
	307.076	191.227	75.2077	145.004
		179.1	90.1659	98.6503
avg	292.116	196.995	79.2684	122.674
stdev	20.2329	19.4539	7.29674	21.0126
as % of wt : 3U	1.59748	1.33374	0.445854	0.799306
	1.78199	1.14565	0.45471	0.66726
	1.82295	1.13522	0.446469	0.860813
		1.06323	0.535268	0.585636
avg	1.73414	1.16946	0.470575	0.728254
stdev	0.120112	0.115488	0.043317	0.124741
								3U	3C	3A	3G
HE	3367.62	206.87	150.482	180.518		contemporaneous wt	wt	29138	193.245	143.058	185.544
	2459.88	217.328	116.709	169.61		for HE , SR , NT ,NR		23986.5	194.655	133.178	174.16
	3181.46	215.358	146.043	150.678				21742.4	194.043	102.809	201.239
	2190.74	187.661	137.338	182.288				21870.2	179.985	141.843	176.532
avg	2799.93	206.804	137.643	170.774			avg	24184.3	190.482	130.222	184.369
stdev	564.087	13.5449	14.9856	14.5227			stdev	3459.1	7.02211	18.7972	12.2694
as % of wt : 3U	13.925	0.8554	0.622239	0.746435			as % of wt : 3U	120.485	0.799063	0.59154	0.76722
	10.1715	0.898642	0.48259	0.701333				99.1832	0.804894	0.550688	0.720147
	13.1552	0.890499	0.603882	0.623047				89.9041	0.80236	0.425113	0.832116
	9.05865	0.77597	0.567888	0.753755				90.4327	0.74423	0.586516	0.729953
avg	11.5776	0.855128	0.56915	0.706143			avg	100.001	0.787637	0.538464	0.762359
stdev	2.33248	0.0560079	0.0619651	0.060051			stdev	14.3032	0.0290362	0.0777259	0.0507336
SR	155.507	299.158	146.781	166.136	X
	144.954	293.103	103.899	184.872
	160.312	294.401	126.67	171.083
	140.07	274.736	113.055	170.801
avg	150.211	290.349	122.601	173.223
stdev	9.31965	10.7295	18.6381	8.09052
as % of wt : 3U	0.643015	1.23701	0.606935	0.686968
	0.599379	1.21197	0.429618	0.76444
	0.662887	1.21734	0.523776	0.707421
	0.579184	1.13602	0.467479	0.706258
avg	0.621116	1.20058	0.506952	0.716272
stdev	0.0385364	0.044366	0.0770677	0.033454
NT	965.414	167.266	98.5125	172.96
	603.125	140.184	103.253	124.86
	1027.39	146.601	113.22	145.274
	769.402	167.858	111.247	142.674
avg	841.334	155.477	106.558	146.442
stdev	193.16	14.2001	6.8805	19.8709
as % of wt : 3U	3.99195	0.691638	0.407346	0.715183
	2.4939	0.579654	0.426946	0.51629
	4.24824	0.606192	0.46816	0.600701
	3.18145	0.694088	0.460003	0.589952
avg	3.47889	0.642893	0.440614	0.605531
stdev	0.798709	0.0587171	0.0284506	0.0821657
NR	873.013	283.494	108.109	157.163
	805	382.334	110.262	163.765
	860.75	270.5	107.114	169.373
	1327.89	297.295	92.1536	121.946
avg	966.662	308.406	104.41	153.062
stdev	242.628	50.4855	8.27572	21.3355
as % of wt : 3U	3.60988	1.17224	0.447029	0.649864
	3.32865	1.58094	0.455929	0.677161
	3.55917	1.11851	0.442914	0.700351
	5.49076	1.22931	0.381052	0.504243
avg	3.99711	1.27525	0.431731	0.632904
stdev	1.00326	0.208756	0.0342198	0.0882215
								3U	3C	3A	3G
NK	1190.74	126.836	74.0922	112.549		contemporaneous wt	wt	17272	148.004	68.6433	117.503
	730.812	134.056	66.7552	136.4		for NK		21888	126.902	72.1061	142.702
	950.625	129.544	63.4804	138.5				13785.2	99.1896	69.4019	152.109
		136.397	74.0345					13574	174.614	81.3723	113.883
avg	957.392	131.708	69.5906	129.15			avg	16629.8	137.177	72.8809	131.549
stdev	230.039	4.31729	5.33499	14.4151			stdev	3894.05	31.9758	5.85275	18.7659
as % of wt : 3U	7.16062	0.762738	0.44556	0.676821			as % of wt : 3U	103.867	0.890036	0.412793	0.706616
	4.3948	0.806155	0.401439	0.820254				131.626	0.763139	0.433617	0.858149
	5.71667	0.779025	0.381745	0.832882				82.8987	0.596486	0.417355	0.914724
		0.820234	0.445213					81.6287	1.05006	0.489339	0.684848
avg	5.75736	0.792038	0.418489	0.776652			avg	100.005	0.824929	0.438276	0.791084
stdev	1.38336	0.0259624	0.0320824	0.0866866			stdev	23.4172	0.192289	0.0351961	0.11285
(Fig. 2)

## Sheet: 3 Fig 4 R6 with Y at aa 13
beta-galactosidase measurements from three-hybrid RNA-binding experiments
all proteins (NTR + RBD) with Tyr as the interpolating RNA-contacting residue
	3U	3C	3A	3G
wt	20699.9	131.68	99.2124	156.457
(NQ)	20013.1	124.321	96.4159	153.583
	27219.7	122.037	99.3632	150.408
		139.874	96.1441	148.354
avg	22644.2	129.478	97.7839	152.201
stdev	3977.32	8.06032	1.74119	3.56053
as % of wt : 3U	91.4143	0.581523	0.43814	0.69094
	88.3816	0.549022	0.42579	0.678252
	120.207	0.538936	0.438806	0.66423
		0.617711	0.42459	0.655159
avg	100.001	0.571798	0.431831	0.672145
stdev	17.5645	0.0355958	0.00768942	0.0157239
						contemporaneous wt	3U
GG	147.977	68.4571	47.4084	67.8424		for GG , CR	22463.4
	155.494	71.841	46.9019	76.3782			20858.2
	190.621	82.9034	51.2799	66.4545			21403.2
	179.865	71.2558	48.3121	78.1594			23255.2
avg	168.489	73.6143	48.4756	72.2086			21258.1
stdev	20.0734	6.36635	1.95842	5.91524			20026.7
							20105.4
							22453
as % of wt : 3U	0.68897	0.318731	0.22073	0.315869		avg	21477.9
	0.72397	0.334486	0.218372	0.355611		stdev	1165.47
	0.887516	0.385992	0.238755	0.309408
	0.837438	0.331762	0.224938	0.363904
avg	0.784473	0.342743	0.225699	0.336198		as % of wt : 3U	104.588
stdev	0.0934604	0.0296413	0.00911825	0.0275409			97.1143
							99.6518
							108.274
CR	170.265	355.487	37.9735	83.5755			98.9761
	188.019	287.84	36.6175	71.2831			93.2427
	157.278	350.772	40.776	69.7155			93.6094
	168.944	474.926	40.3016	74.5705			104.54
avg	171.126	367.256	38.9171	74.7862		avg	99.9995
stdev	12.6838	78.124	1.96222	6.19899		stdev	5.42636
as % of wt : 3U	0.79274	1.65512	0.176802	0.389122
	0.875404	1.34016	0.170488	0.331889
	0.732277	1.63317	0.18985	0.32459
	0.78659	2.21122	0.187641	0.347195
avg	0.796752	1.70992	0.181195	0.348199
stdev	0.059055	0.36374	0.00913595	0.0288621
NA	10057.6	113.036	68.509	123.089		contemporaneous wt	26091
	11360.2	118.339	81.1991	125.648		for NA	37510.7
	11912.7	109.343	66.0996	116.123			35940.9
	12155.6	121.245	70.0107	121.885			23642
avg	11371.5	115.491	71.4546	121.686			30410.9
stdev	937.052	5.32411	6.6931	4.02704			26573.4
							23040
							28814.7
as % of wt : 3U	34.6777	0.389739	0.236213	0.4244		avg	29003
	39.1691	0.408022	0.279968	0.433225		stdev	5361.42
	41.0739	0.377007	0.227906	0.400383
	41.9115	0.418043	0.241391	0.420249
avg	39.208	0.398203	0.24637	0.419564		as % of wt : 3U	89.9597
stdev	3.23088	0.0183571	0.0230773	0.0138849			129.334
							123.921
							81.5157
							104.854
							91.6228
							79.4402
							99.3508
						avg	99.9999
						stdev	18.4857
	3U	3C	3A	3G		contemporaneous wt	28085.6
VL	67.0413	103.163	783.962	111.662		for VL, SD, SE, GR	27138.3
	58.2244	100.566	757.042	111.685			21650.7
	57.2148	91.898	756.397	91.9417			22728.5
	57.7768	103.578	956.641	98.976			22868.3
avg	60.0643	99.8012	813.51	103.566			24355.6
stdev	4.6696	5.43481	96.281	9.7921			32684.5
							24583.8
						avg	25511.9
as % of wt : 3U	0.262783	0.40437	3.07291	0.437684		stdev	3636.29
	0.228224	0.394191	2.9674	0.437774
	0.224266	0.360215	2.96487	0.360386
	0.226469	0.405997	3.74977	0.387959		as % of wt : 3U	110.088
avg	0.235436	0.391193	3.18874	0.405951			106.375
stdev	0.0183035	0.0213029	0.377395	0.0383823			84.8647
							89.0895
							89.6374
							95.4671
SD	54.5516	98.5709	51.3217	6408.19			128.114
	44.7809	100.293	50.4167	4411.8			96.3616
	47.5035	97.952	35.4895	6781.08		avg	99.9996
	56.3744	94.3785	45.0234	5440.59		stdev	14.2532
avg	50.8026	97.7986	45.5628	5760.41
stdev	5.5451	2.48594	7.26838	1061.82
as % of wt : 3U	0.213827	0.386371	0.201167	25.1183
	0.175529	0.393121	0.197619	17.2931
	0.186201	0.383945	0.139109	26.5799
	0.220972	0.369938	0.176479	21.3256
avg	0.199132	0.383344	0.178594	22.5792
stdev	0.0217353	0.00974419	0.02849	4.16206
SE	61.3476	109.609	2454.36	18562.1
	55.1915	93.4	2486.58	20100.5
	55.7194	94.8538	2723.44	18709.3
	53.3721	96.6147	1955.77	18197.8
avg	56.4077	98.6194	2405.04	18892.4
stdev	3.44337	7.44339	322.647	833.586
as % of wt : 3U	0.240466	0.429637	9.62041	72.7583
	0.216335	0.366102	9.74671	78.7884
	0.218405	0.371801	10.6751	73.3353
	0.209204	0.378703	7.66608	71.3304
avg	0.221102	0.386561	9.42708	74.0531
stdev	0.0134971	0.029176	1.26469	3.26743
p-value G vs. A	<0.0001
GR	539.566	1063.09	54.251	97.0245
	361.971	1608.27	53.7787	112.16
	350.652	1339.58	56.5844	103.873
	347.818	1134.33	54.7946	93.7169
avg	400.002	1286.31	54.8522	101.693
stdev	93.2433	244.555	1.22714	8.15929
as % of wt : 3U	2.11495	4.167	0.212649	0.380309
	1.41882	6.30396	0.210797	0.439636
	1.37446	5.25078	0.221795	0.407152
	1.36335	4.44625	0.21478	0.367344
avg	1.5679	5.042	0.215005	0.39861
stdev	0.365488	0.958588	0.00481005	0.0319822
p-value C vs. U	0.000507

## Sheet: 4 Fig 4 with R at aa 13
beta-galactosidase measurements from three-hybrid RNA-binding experiments
all proteins (NTR + RBD), with Arg as the interpolating, RNA-contacting residue (except the wild type control)
	3U	3C	3A	3G		= variant in Hs Pum1
wt = NQ / Y	37323.8
	43108.8
	34500.5
	37708.6
	35230.6
	29266.9
avg	36189.9
stdev	4542.35
as % of wt : 3U	103.133
	119.118
	95.3317
	104.196
	97.349
	80.8701
avg	99.9996
stdev	12.5514
VL / R	61.8929	114.693	58.9056	125.984
	60.7419	133.937	64.1525	136.432
	61.4787	118.013	59.7063	118.93
	55.1944	136.149	61.2356	119.855
avg	59.827	125.698	61	125.3
stdev	3.12482	10.913	2.31331	8.05455
as % of wt : 3U	0.171022	0.316919	0.162768	0.348119
	0.167842	0.370093	0.177266	0.376989
	0.169878	0.326093	0.16498	0.328626
	0.152513	0.376207	0.169206	0.331183
avg	0.165314	0.347328	0.168555	0.346229
stdev	0.00863449	0.0301547	0.00639212	0.0222563
SD / R	51.3097	98.5109	48.3152	368.638
	63.0395	99.8015	66.2727	465.568
	55.588	91.1765	64.2192	405.236
	62	105.593	47.5186	473.238
avg	57.9843	98.7704	56.5814	428.17
stdev	5.53694	5.92579	10.0452	49.9993
as % of wt : 3U	0.141779	0.272205	0.133504	1.01862
	0.17419	0.275771	0.183124	1.28646
	0.1536	0.251938	0.17745	1.11975
	0.171318	0.291774	0.131303	1.30765
avg	0.160222	0.272922	0.156346	1.18312
stdev	0.0152996	0.0163741	0.027757	0.138158
SE / R	102.438	112.179	62.7391	1013.1		X
	60.3519	111.682	56.1597	977.126
	28.3864	117.191	59.431	831.771
	49.8967	113.874	48.8244	1129
avg	60.2682	113.731	56.7885	987.747
stdev	31.1036	2.48972	5.95019	122.522
as % of wt : 3U	0.283056	0.309973	0.17336	2.79938
	0.166764	0.308599	0.15518	2.69999
	0.0784372	0.32382	0.164219	2.29835
	0.137874	0.314655	0.134911	3.11964
avg	0.166533	0.314262	0.156918	2.72934
stdev	0.0859452	0.00687957	0.0164415	0.338553
NA / R	51.3655	108.108	39.9098	111.531
	51.1673	100.266	56.8523	121.788
	55.3347	78.3713	56.2731	123.203
	46.7427	122.46	40.2656	125.186
avg	51.1525	102.301	48.3252	120.427
stdev	3.51107	18.4107	9.51586	6.09242
as % of wt : 3U	0.141933	0.298722	0.110279	0.308181
	0.141385	0.277054	0.157094	0.336524
	0.152901	0.216555	0.155493	0.340434
	0.129159	0.33838	0.111262	0.345914
avg	0.141344	0.282678	0.133532	0.332763
stdev	0.00970178	0.0508722	0.0262942	0.0168345
GR / R	50.0796	111.019	57.7695	125.173
	62.8462	133.978	64.4911	131.184
	56.2024	113.364	63.7519	125.978
	49.5176	129.492	65.6695	123.529
avg	54.6614	121.963	62.9205	126.466
stdev	6.2401	11.4711	3.52364	3.30596
as % of wt : 3U	0.13838	0.306768	0.159628	0.345878
	0.173656	0.370207	0.178201	0.362486
	0.155298	0.313246	0.176159	0.348102
	0.136827	0.357813	0.181458	0.341336
avg	0.15104	0.337008	0.173862	0.34945
stdev	0.0172426	0.031697	0.00973649	0.00913501

## Sheet: 5 Fig 6
beta-galactosidase measurements from three-hybrid RNA-binding experiemnts
R6 (NTR + RBD) and RBD-only proteins
NTR + RBD				RBD
	3U = 4A	4G			3U = 4A
wt	28085.6			wt	20648.8
	27138.3				21226.2
	21650.7				18360.7
	22728.5				17260.7
	22868.3				18550
	24355.6	7859.38			18114.7
	32684.5	7147.23			18192.8
	24583.8	8322.93			19227.3
avg	25511.9	7776.51		avg	18947.6
stdev	3636.29	592.214		stdev	1350.96
as % of wt : 3U	110.088
	106.375
	84.8647
	89.0895
	89.6374
	95.4671	30.8066
	128.114	28.0152
	96.3616	32.6236
avg	99.9996	30.4818
stdev	14.2532	2.32132
	3G				3G
SD	6408.19			SD	296.296
	4411.8				303.862
	6781.08				277.092
	5440.59				254.272
avg	5760.41			avg	282.881
stdev	1061.83			stdev	22.1521
	3G				3G
SE	18562.1			SE	6076.97
	20100.5				5683.44
	18709.3				7322.32
	18197.8				5540.74
avg	18892.4			avg	6155.87
stdev	833.586			stdev	810.02
p-values	+ vs - NTR	wt		0.000993
	binding to 3U
	+ vs - NTR	SD		0.001943
	binding to 3G	SE		< 0.0001

## Sheet: 6 Fig 7 R6 mutants NTR + RBD
beta-galactosidase measurements from three-hybrid RNA-binding experiments
all proteins NTR + RBD
	3U	3C	3A	3G
wt = NQ / Y	23929.4	125.923	84.1893	110.582
	12051.2	128.326	59.7455	122.915
	15381	134.024	93.0863	122.121
	19679.4	120.215	85.55	137.754
avg	17760.2	127.122	80.6428	123.343
stdev	5163.81	5.722	14.4706	11.1386
as % of wt : 3U	134.737	0.709024	0.474039	0.622647
	67.8561	0.722555	0.336405	0.692087
	86.6045	0.754637	0.524135	0.687617
	110.807	0.676887	0.4817	0.775643
avg	100.001	0.715776	0.45407	0.694499
stdev	29.0755	0.0322185	0.0814787	0.0627172
HE / F	11348	820.88	801.873	164.896
	7840.58	1359.54	633.021	170.841
	6526.5	835.945	643.13	137.075
	11343		528.848	184.971
avg	9264.53	1005.46	651.718	164.446
stdev	2462.08	306.741	112.645	20.0961
as % of wt : 3U	63.8965	4.62207	4.51505	0.928467
	44.1474	7.65508	3.56431	0.961942
	36.7483	4.7069	3.62123	0.771818
	63.8684		2.97775	1.0415
avg	52.1652	5.66135	3.66958	0.925933
stdev	13.8631	1.72714	0.634264	0.113154
p-value U vs. C	0.006958
NT / W	3822.84	133.265	80.0187	145.642
	4174.94	131.939	83.6682	121.857
	3883.06	149.1	81.7696	123.161
	3783.95	119.648	79.55	127.548
avg	3916.2	133.488	81.2516	129.552
stdev	177.248	12.0794	1.87292	10.9996
as % of wt : 3U	21.525	0.750364	0.450556	0.820058
	23.5076	0.742902	0.471105	0.68613
	21.8641	0.83953	0.460414	0.693474
	21.306	0.673695	0.447917	0.718175
avg	22.0507	0.751622	0.457498	0.729459
stdev	0.998018	0.0680148	0.0105457	0.0619349
								3U	3C	3A	3G
HE / Y	21311.1	3155.18	2280.8	211.852		contemporaneous wt	wt	23768.2	218.116	145.644	171.413
	21638.7	2810.03	2699.4	222.684		for HE / Y		28164.4	173.047	165.199	166.043
	20594.3	3292.9	3131.55	208.321				27473.8	187.826	132.718	169.291
	18059.2	3346.03	3401.12	231.946				26071.3	159.432	136.064	159.224
avg	20400.8	3151.03	2878.22	218.701			avg	26369.4	184.605	144.906	166.493
stdev	1620.88	241.144	492.101	10.7385			stdev	1940.5	25.1705	14.5955	5.32516
as % of wt : 3U	80.8186	11.9655	8.64954	0.803413			as % of wt : 3U	90.137	0.82717	0.552329	0.650054
	82.0612	10.6566	10.237	0.844492				106.809	0.656252	0.62649	0.62969
	78.1005	12.4878	11.8759	0.790022				104.19	0.7123	0.503311	0.642007
	68.4863	12.6892	12.8982	0.879615				98.8709	0.604619	0.515999	0.603831
avg	77.3667	11.9498	10.9151	0.829385			avg	100.002	0.700085	0.549532	0.631395
stdev	6.14691	0.914497	1.86621	0.040724			stdev	7.35903	0.0954547	0.0553511	0.0201948
p-value U vs. C	0.000234
NT / Y	24767.9	208.565	98.4229	168.159		contemporaneous wt	wt	30598.6	206.516	152.867	202.753
	21929.8	156.393	91.2103	185.427		for NT /Y		28800.6	201.336	158.95	202.575
	26099.4	165.004	91.4247	183.886				30116.3	196.835	142.833	198.893
	28971.3	172.082	92.3311	178.09				29700.9	193.378	155.613	195.526
avg	25442.1	175.511	93.3473	178.891			avg	29804.1	199.516	152.566	199.937
stdev	2925.63	22.9508	3.41847	7.82047			stdev	762.938	5.69158	6.949	3.43713
as % of wt : 3U	83.1026	0.699789	0.330234	0.564217			as % of wt : 3U	102.666	0.692915	0.512907	0.680287
	73.5802	0.524739	0.306034	0.622154				96.6335	0.675533	0.533316	0.679692
	87.57	0.55363	0.306753	0.616986				101.048	0.66043	0.47924	0.667336
	97.2062	0.57738	0.309794	0.597538				99.6539	0.648833	0.522122	0.656038
avg	85.3647	0.588884	0.313204	0.600224			avg	100	0.669428	0.511896	0.670838
stdev	9.81625	0.0770057	0.0114698	0.0262397			stdev	2.55985	0.0190967	0.0233157	0.0115324

## Sheet: 7 Fig 7 R6 mutants RBD
beta-galactosidase measurements from three-hybrid RNA-binding experiments
all proteins RBD-only
					= variant in Hs Pum1
	3U	3C	3A	3G
wt = NQ / Y	24010.4	97.1494	83.9263	137.47
	21136.3	112.595	79.535	112.038
	20283.6	122.327	79.1106	109.092
	23373.7	130.239	70.3249	135.502
avg	22201	115.578	78.2242	123.525
stdev	1775.67	14.2479	5.69843	15.0353
as % of wt : 3U	108.15	0.43759	0.378029	0.619205
	95.2043	0.507162	0.35825	0.504653
	91.3635	0.550996	0.356338	0.491381
	105.282	0.586636	0.316765	0.610342
avg	100	0.520596	0.352345	0.556395
stdev	7.99817	0.0641767	0.0256674	0.0677234
HE / F	661.623	124.67	62.7944	99.4869	X
	406.229	184.053	65.1086	96.628
	605.208	99.5104	51.5833	106.642
		122.422	82.8306	113.959
avg	557.687	132.664	65.5792	104.179
stdev	134.165	36.0963	12.9289	7.76199
as % of wt : 3U	2.98015	0.561551	0.282845	0.448119
	1.82978	0.829032	0.293269	0.435242
	2.72604	0.448225	0.232347	0.480347
		0.551427	0.373094	0.513305
avg	2.51199	0.597559	0.295389	0.469253
stdev	0.60432	0.162589	0.0582359	0.0349624
NT / W	150.127	99.1311	62.2351	91.8741	X
	113.447	56.2462	56.1051	94.4769
	87.0594	81.6131	79.9741	73.9035
		79.2054	68.5647	75.012
avg	116.878	79.049	66.7198	83.8166
stdev	31.6734	17.6055	10.1958	10.8682
as % of wt : 3U	0.676216	0.446517	0.280326	0.413829
	0.510999	0.25335	0.252714	0.425553
	0.392142	0.36761	0.360228	0.332884
		0.356765	0.308836	0.337877
avg	0.526453	0.35606	0.300526	0.377535
stdev	0.142666	0.0793005	0.0459251	0.0489539
								3U	3C	3A	3G
HE / Y	3367.62	206.87	150.482	180.518		contemporaneous wt	wt	29138	193.245	143.058	185.544
	2459.88	217.328	116.709	169.61		for HE /Y, NT / Y		23986.5	194.655	133.178	174.16
	3181.46	215.358	146.043	150.678				21742.4	194.043	102.809	201.239
	2190.74	187.661	137.338	182.288				21870.2	179.985	141.843	176.532
avg	2799.93	206.804	137.643	170.774			avg	24184.3	190.482	130.222	184.369
stdev	564.087	13.5449	14.9856	14.5227			stdev	3459.1	7.02211	18.7972	12.2694
as % of wt : 3U	13.925	0.8554	0.622239	0.746435			as % of wt : 3U	120.485	0.799063	0.59154	0.76722
	10.1715	0.898642	0.48259	0.701333				99.1832	0.804894	0.550688	0.720147
	13.1552	0.890499	0.603882	0.623047				89.9041	0.80236	0.425113	0.832116
	9.05865	0.77597	0.567888	0.753755				90.4327	0.74423	0.586516	0.729953
avg	11.5776	0.855128	0.56915	0.706143			avg	100.001	0.787637	0.538464	0.762359
stdev	2.33248	0.0560079	0.0619651	0.060051			stdev	14.3032	0.0290362	0.0777259	0.0507336
NT / Y	965.414	167.266	98.5125	172.96
	603.125	140.184	103.253	124.859
	1027.39	146.601	113.22	145.274
	769.402	167.858	111.247	142.674
avg	841.334	155.477	106.558	146.442
stdev	193.16	14.2001	6.8805	19.871
as % of wt : 3U	3.99195	0.691638	0.407346	0.715183
	2.4939	0.579654	0.426946	0.51629
	4.24824	0.606192	0.46816	0.600701
	3.18145	0.694088	0.460003	0.589952
avg	3.47889	0.642893	0.440614	0.605531
stdev	0.798709	0.058717	0.028451	0.082166

## Sheet: 8 additional engineered R6 
beta-galactosidase measurements from three-hybrid RNA-binding experiments
										= variant in Hs Pum1
		3U	3C	3A	3G				3U
NTR + RBD	NL	4845.5	95.9079	57.4	77.524		contemporaneous wt		17160.6
		3743.96	79.5172	32.8688	68.5768		for NL NTR + RBD		16813.2
		4512.8	68.6688	53.9027	68.7042				19072.8
		3689.86	81.2527	7.5047	68.9905				14599.4
	avg	4198.03	81.3366	37.9191	70.9489				12270.8
	stdev	572.337	11.1969	22.9893	4.38683				15633.2
									16979.7
									17350.9
	as % of wt : 3U	29.846	0.590748	0.353557	0.477511			avg	16235.1
		23.061	0.489789	0.202456	0.422401			stdev	2063.15
		27.7967	0.422967	0.332016	0.423186
		22.7278	0.500478	0.0462255	0.424949
	avg	25.8579	0.500996	0.233564	0.437012			as % of wt : 3U	105.701
	stdev	3.52533	0.0689679	0.141603	0.0270208				103.562
									117.48
									89.9254
									75.5824
									96.2932
									104.587
									106.873
								avg	100
								stdev	12.7081
RBD	NL	131.662	86.3952	47.6288	96.8405		contemporaneous wt	wt	24386.1	X
		110.872	71.9973	45.7	82.3754		for NL RBD		17470.1
		112	97.1622	36.3038	97.2686				23435.9
		110.646	72.9407	36.6412	84.2576				22395.4
	avg	116.295	82.1238	41.5685	90.1855				21282.8
	stdev	10.2618	11.9899	5.93836	7.97075				22726.6
									20088.4
									23982.9
	as % of wt : 3U	0.599254	0.393224	0.21678	0.440765			avg	21971
		0.504628	0.327692	0.208001	0.374928			stdev	2300.71
		0.509763	0.442229	0.165235	0.442714
		0.5036	0.331986	0.166771	0.383494
	avg	0.529311	0.373783	0.189197	0.410475			as % of wt : 3U	110.992
	stdev	0.0467063	0.0545715	0.0270282	0.0362785				79.5146
									106.668
									101.932
									96.8678
									103.439
									91.4316
									109.157
								avg	100
								stdev	10.4716
NTR+RBD	VH	33.3443	53.6979	45.6915	80.3511				3U	X
		23.6923	54.9656	42.1271	70.2303		contemporaneous wt	wt	22463.4
		30.196	57.2995	60.0944	69.9281		for VH NTR+RBD		20858.2
		28.1618		77.8913	65.7426				21403.2
	avg	28.8486	55.321	56.4511	71.563				23255.2
	stdev	4.045	1.82688	16.2676	6.20635				21258.1
									20026.7
									20105.4
	as % of wt : 3U	0.155249	0.250014	0.212736	0.374109				22453
		0.11031	0.255916	0.196141	0.326987			avg	21477.9
		0.14059	0.266782	0.279795	0.32558			stdev	1165.47
		0.131119		0.362656	0.306093
	avg	0.134317	0.25757	0.262832	0.333192
	stdev	0.0188332	0.00850581	0.0757407	0.0288963			as % of wt : 3U	104.588
									97.1143
									99.6518
									108.274
									98.9761
									93.2427
									93.6094
									104.54
								avg	99.9995
								stdev	5.42636
