# Supplementary material
Source: HighWire-hosted journal article supplement (doi:10.1101/rna.080791.125)
Supplement: Supplemental_Table_S4.xlsx [file Supplemental_Table_S4.xlsx]

## Sheet: 1 Figs 3&4 R5 mutants NTR+RBD
beta-galactosidase measurements from three-hybrid RNA-binding experiemnts
all proteins (NTR + RBD)
	4A	4G	4U	4C	selectivity index
wt	37039.5	10021.7	6989.93	753.147		contemporaneous wt
	30438.7	10453.7	6493.36	728.653		for VL , RG, QS
	29860	9935.98	5161.93	725.359
	33254.9	9632.37	6391.76	739.899
avg	32648.3	10011	6259.24	736.764
stdev	3281.66	339.179	776.824	12.5707
as % of wt : 4A	113.451	30.6962	21.41	2.30687
	93.2329	32.0196	19.889	2.23185
	91.4605	30.4336	15.8109	2.22176
	101.859	29.5037	19.5778	2.26629
avg	100.001	30.6633	19.1719	2.25669
stdev	10.0516	1.0389	2.37939	0.0385038
					4.6667
p-value A vs. G	0.000837
p-value A vs. U	0.000567
p-value G vs. U	0.000116
VL	40212.7	206.256	2671.15	301.802
	27961.7	187.976	2280.91	285.995
	35326.7	216.234	3009.52	339.933
	28726.1	192.016	3324.9	340.637
avg	33056.8	200.62	2821.62	317.092
stdev	5804.42	13.0315	448.553	27.5492
as % of wt : 4A	123.171	0.631756	8.18165	0.924412
	85.646	0.575766	6.98638	0.875996
	108.205	0.662319	9.21808	1.04121
	87.9875	0.58814	10.1841	1.04336
avg	101.252	0.614495	8.64255	0.971244
stdev	17.7788	0.039915	1.37391	0.0843826
					63.8517
p-value A vs. U	0.0019
RG	2938.89	4105.21	13219.9	15252.3
	3020.69	2996.6	12602.1	15641.4
	2163.31	4389.32	13156	18045.3
		2398.84	11456.3
avg	2707.63	3472.49	12608.6	16313
stdev	473.163	934.541	816.714	1512.77
as % of wt : 4A	9.00176	12.5742	40.4921	46.7175
	9.25228	9.17851	38.5998	47.9091
	6.62618	13.4444	40.2966	55.2722
		7.34759	35.0905
avg	8.29341	10.6362	38.6197	49.9663
stdev	1.44929	2.86248	2.50157	4.63356
					2.63959
QS	14053.7	24982.2	16424.6	6740.3
	12270.7	27704.2	16989.3	5516.71
	15074.9	30491	16747.4	6983.27
	15078.6	38033.4	16475.6	6800.58
avg	14119.5	30302.7	16659.2	6510.22
stdev	1323.52	5623.12	261.731	670.345
as % of wt : 4A	43.0462	76.52	50.3081	20.6454
	37.5848	84.8573	52.0378	16.8975
	46.1741	93.3931	51.2969	21.3896
	46.1854	116.495	50.4643	20.83
avg	43.2476	92.8164	51.0268	19.9406
stdev	4.0539	17.2235	0.801674	2.05325
					1.46889
								4A	4G	4U	4C
GQ	19430	18216.8	12847	15554.2		contemporaneous wt	wt	14713.8	6011.94	4400.12	329.24
	21111.3	17024.3	9843.19	14335.1		for GQ , AP, GG , NY		17048.1	6830.46	3925.96	390.01
	14306	16168.9	11078.2	15170.4				25312.7	6137.53	3301.41	412.395
	15319.3	12859.6	9205.23	12988.9					6672.96	3798.6	431.818
avg	17541.7	16067.4	10743.4	14512.2			avg	19024.9	6413.22	3856.52	390.866
stdev	3251.5	2297.5	1603.51	1135.92			stdev	5569.09	399.411	451.599	44.4937
as % of wt : 4A	102.129	95.7517	67.5271	81.7567			as % of wt : 4A	77.3395	31.6002	23.1281	1.73056
	110.966	89.4836	51.7382	75.3489				89.6089	35.9026	20.6358	2.04999
	75.1957	84.9876	58.2298	79.7394				133.05	32.2603	17.353	2.16765
	80.5221	67.5932	48.3849	68.2726					35.0747	19.9664	2.26974
avg	92.2033	84.454	56.47	76.2794			avg	99.9994	33.7094	20.2708	2.05448
stdev	17.0907	12.0762	8.42843	5.97066			stdev	29.2725	2.0994	2.37371	0.23387
					0.694566
AP	14854.8	4534.87	8276.16	509.536
	16736.8	4971.34	10494.4	463.247
	14749.5	4966.4	4775.9	557.229
	16152		5081.68	466.921
avg	15623.3	4824.2	7157.03	499.233
stdev	978.719	250.582	2730.52	44.0027
as % of wt : 4A	78.0802	23.8364	43.5015	2.67825
	87.9728	26.1306	55.161	2.43494
	77.5268	26.1046	25.1033	2.92893
	84.8987		26.7106	2.45425
avg	82.1196	25.3572	37.6191	2.62409
stdev	5.14438	1.31712	14.3523	0.231289
					2.93481
GG	7668.41	11239.8	7119.6	1281.44
	7426.37	8107.97	5071.58	1273.43
	7677.62	7365.68	5344.86	1322.74
		8749.8	5720.73	1369.36
avg	7590.8	8865.8	5814.19	1311.74
stdev	142.478	1680.65	910.052	44.0694
as % of wt : 4A	40.307	59.0789	37.4224	6.73557
	39.0348	42.6174	26.6574	6.69347
	40.3554	38.7158	28.0939	6.95263
		45.9911	30.0696	7.19768
avg	39.8991	46.6008	30.5608	6.89484
stdev	0.748899	8.83391	4.78346	0.23164
					1.24416
p-value A vs. G	0.228
p-value A vs. U	0.0214
p-value G vs. U	0.0188
NY	1751.27	247.305	9786.31	89.8043
	1982.34	201.564	7134.35	91.9333
	2083.63	217.848	9590.89	81.2981
	1383.84	205.343	8513.83	113.613
avg	1800.27	218.015	8756.34	94.1622
stdev	310.514	20.7298	1217.51	13.7571
as % of wt : 4A	9.20507	1.2999	51.4392	0.472033
	10.4197	1.05947	37.4999	0.483224
	10.952	1.14506	50.412	0.427323
	7.2738	1.07933	44.7507	0.597177
avg	9.46265	1.14594	46.0255	0.494939
stdev	1.63214	0.108961	6.39952	0.0723106
					28.0493
								4A	4G	4U	4C
GP	5553.35	2144.15	1543.15	192.794		contemporaneous wt	wt	18786.5	4760.08	2027.48	390.322
	4704.11	2051.48	1396.66	199.395		for GP		12541.6	3995.22	2236.51	239.463
	5246.6	2059.75	1050.99	133.132				16121.8	5655.6	2012.21	322.58
avg	5168.02	2085.13	1330.27	175.107			avg	15816.6	4803.63	2092.07	317.455
stdev	430.041	51.2808	252.709	36.5013			stdev	3133.61	831.044	125.326	75.56
as % of wt : 4A	35.11	13.556	9.75629	1.2189			as % of wt : 4A	118.774	30.0947	12.8184	2.46773
	29.7408	12.9701	8.83014	1.26064				79.292	25.259	14.1399	1.51396
	33.1707	13.0224	6.64469	0.8417				101.927	35.7564	12.7218	2.03945
avg	32.6738	13.1828	8.41037	1.10708			avg	99.9978	30.3701	13.2267	2.00705
stdev	2.71886	0.324213	1.59771	0.230773			stdev	19.8117	5.25412	0.792349	0.477714
					3.43304
								4A
AA	16321.4	3050.19	3985.71	209.841		contemporaneous wt	wt	17160.6
	14521.5	2715.61	4336.81	232.355		for AA		16813.2
	15356.9	3558.49	3897.93	237.934				19072.8
	10670.1	2589.1	4029.05	231.585				14599.4
avg	14217.5	2978.35	4062.37	227.929				12270.8
stdev	2476.63	432.928	190.912	12.3862				15633.2
								16979.7
								17350.9
as % of wt : 4A	100.532	18.7877	24.5501	1.29252			avg	16235.1
	89.4454	16.7269	26.7127	1.4312			stdev	2063.15
	94.5915	21.9187	24.0095	1.46556
	65.7229	15.9476	24.817	1.42645
avg	87.5731	18.3452	25.0223	1.40393			as % of wt : 4A	105.701
stdev	15.2549	2.66663	1.17593	0.076293				103.562
					4.43427			117.48
								89.9254
								75.5824
								96.2932
								104.587
								106.873
							avg	100
							stdev	12.7081
								4A	4G	4U	4C
GV	7222.75	11438.4	8820.03	1385.54		contemporaneous wt		15193.2	4826.29	2876.92	177.689
	8584.14	8467.16	7119.73	1637.84		for GV		17376.9	4107.28	2412.45	194.408
	8348.1	9118.94	8754.89	1028.94				16320.5	4118.2	2876.75	199.856
avg	8051.66	9674.85	8231.55	1350.77			avg	16296.9	4350.59	2722.04	190.651
stdev	727.497	1561.69	963.414	305.935			stdev	1092.07	412.003	268.116	11.5512
as % of wt : 4A	44.3195	70.1873	54.1206	8.50182			as % of wt : 4A	93.227	29.6146	17.6531	1.09032
	52.6732	51.9553	43.6874	10.0499				106.627	25.2027	14.803	1.19291
	51.2247	55.9547	53.7209	6.31367				100.144	25.2697	17.652	1.22633
avg	49.4058	59.3658	50.5096	8.28848		14.3384	avg	99.9994	26.6957	16.7027	1.16985
stdev	4.46399	9.5827	5.9116	1.87725			stdev	6.70104	2.52809	1.64519	0.0708792
					1.02897
GR	1412.96	1202.44	9500.61	19318		contemporaneous wt		29073.8	8425.56	4931.81	889.372
	1373.32	1144.59	8582.91	18919		for GR , SP		20841.1	8246.07	4959.39	659.013
	1158.95	859.538	9640.26	13588.7				21847.3	6526.53	3739.66	614.75
	1584.13	949.851	8140.81	19543.8				22847.6	8480.6		520.859
avg	1382.34	1039.1	8966.15	17842.4			avg	23652.5	7919.69	4543.62	670.999
stdev	174.775	161.261	722.989	2847.51			stdev	3705.91	934.16	696.385	156.564
as % of wt : 4A	5.97396	5.08386	40.1683	81.6758			as % of wt : 4A	122.923	35.6231	20.8516	3.76024
	5.80635	4.83932	36.2883	79.9889				88.1157	34.8642	20.9682	2.78629
	4.90003	3.6341	40.7588	57.4526				92.3698	27.594	15.8112	2.59915
	6.69765	4.01594	34.4191	82.6306				96.5991	35.8558		2.20218
avg	5.8445	4.39331	37.9086	75.437			avg	100.002	33.4842	19.2103	2.83696
stdev	0.738943	0.681809	3.05678	12.0392			stdev	15.6685	3.9496	2.9443	0.661947
					7.36847
p-value C vs. U	0.00909
SP	12229	17398.7	2591.54	131.455
	14278	17859.3	1895.16	157.273
	17082.1	15367.3	1397.19	151.716
	16042.6		1689.49	132.986
avg	14907.9	16875.1	1893.34	143.358
stdev	2128.2	1325.96	508.331	13.0735
as % of wt : 4A	51.704	73.5614	10.9569	0.55579
	60.3672	75.5086	8.01269	0.664947
	72.2225	64.9725	5.90729	0.641452
	67.8279		7.14311	0.562261
avg	63.0304	71.3475	8.00501	0.606112
stdev	8.99798	5.60612	2.14921	0.0552742
					8.2855
								4A	4G	4U	4C
NA	3053.27	1550.37	17311.6	81.0463		contemporaneous wt		15874.7	6677.79	3331.35	537.904
	3168.83	1077.04	10291.6	59.769		for NA , ST		17349.8	7317.12	3549.27	338.655
	2551.45	1365.25	12069.6	67.9959				21314.4	5780.03	4193.55	510.705
	4398.21		13215.8	82.4435					6138.88		315.004
avg	3292.94	1330.89	13222.2	72.8137			avg	18179.6	6478.46	3691.39	425.567
stdev	784.064	238.526	2979.96	10.861			stdev	2813.23	669.875	448.327	114.958
as % of wt : 4A	16.7947	8.52788	95.2236	0.445799			as % of wt : 4A	87.3193	36.7315	18.3243	2.95877
	17.4303	5.92434	56.6094	0.328762				95.4337	40.2482	19.5229	1.86279
	14.0344	7.50963	66.3894	0.374015				117.241	31.7933	23.0668	2.80916
	24.1926		72.694	0.453484					33.7672		1.73269
avg	18.113	7.32062	72.7291	0.400515			avg	99.9981	35.6351	20.3047	2.34085
stdev	4.31278	1.31202	16.3914	0.0597415			stdev	15.4743	3.68468	2.46604	0.632332
					9.41949
p-value U vs. A	0.00758
ST	12026.5	15366.7	4087.16	387.696
	11990.2	14747.8	3836.36	488.788
	13696	14538.6	4499.9	395.353
	11753.9	14313.2	4657.05	550.808
avg	12366.7	14741.6	4270.12	455.661
stdev	894.436	452.977	376.004	78.33
as % of wt : 4A	66.1522	84.5255	22.4816	2.13254
	65.9528	81.1213	21.1021	2.6886
	75.3356	79.9701	24.7519	2.17466
	64.653	78.7307	25.6163	3.02975
avg	68.0234	81.0869	23.488	2.50639
stdev	4.91989	2.49162	2.06823	0.430858
					3.1194
Notes:
GK variant previously characterized in Wharton et al. (2025), and repeated in Tab 6
SD & SE variants in Tab 4
GS & CR variants in Tab 5
(Figs. 3&4)

## Sheet: 2 Figs 3&4 R5 mutants RBD
beta-galactosidase measurements from three-hybrid RNA-binding experiemnts
all proteins RBD-only
	4A	4G	4U	4C	selectivity index
wt	43471.9	3849.3	2460.45	222.857		contemporaneous wt
	41345.6	3216.71	2505.28	289.16		for VL
	38758.2	2964.58	2141.45	271.765
	32462.1	3135.73		245.526
avg	39009.4	3291.58	2369.06	257.327
stdev	4771.52	386.385	198.383	29.1504
as % of wt : 4A	111.441	9.86773	6.30738	0.571296
	105.99	8.24607	6.4223	0.741264
	99.3572	7.59972	5.48964	0.696672
	83.2169	8.03849		0.629409
avg	100.001	8.438	6.07311	0.65966
stdev	12.2318	0.990503	0.508558	0.0747273
					14.8529
VL	8944.68	80.3016	236.588	111.232
	6450.86	117.004	184.079	109.733
	8832.61	99.7166	160.863	96.0287
	10108.3	117.699	180.074	87.7101
avg	8584.12	103.68	190.401	101.176
stdev	1534.69	17.6663	32.4159	11.2866
as % of wt : 4A	22.9298	0.205854	0.606496	0.285143
	16.5368	0.29994	0.471889	0.281302
	22.6425	0.255624	0.412373	0.246171
	25.9129	0.301722	0.461622	0.224846
avg	22.0055	0.265785	0.488095	0.259365
stdev	3.9342	0.0452878	0.0830984	0.0289334
					41.9032
								4A	4G	4U	4C
RG	95.0038	114.686	181.699	281.132		contemporaneous wt		22158	1395.36	992.304	133.555
	90.2321	106.019	207.234	255.992		for RG		19817.7	1077.14	1115.2	135.656
	95.4846	90.094	160.273	155.378				21628.8	1582.79	729.071	132.164
	101.872	97.7595	165.392	310.563				22821.6	1512.56	888.855	132.731
avg	95.6481	102.14	178.649	250.766			avg	21606.5	1391.96	931.357	133.526
stdev	4.77878	10.5947	21.1333	67.389			stdev	1288.52	223.667	163.543	1.53063
as % of wt : 4A	0.43969	0.530781	0.840928	1.30111			as % of wt : 4A	102.55	6.45789	4.59251	0.618109
	0.417606	0.490671	0.959106	1.18477				91.7189	4.98516	5.16129	0.627836
	0.441915	0.416967	0.741763	0.719111				100.101	7.32534	3.37423	0.61167
	0.471476	0.452444	0.765454	1.43732				105.621	7.00032	4.11374	0.614295
avg	0.442672	0.472716	0.826813	1.16058			avg	99.9977	6.44218	4.31044	0.617977
stdev	0.0221168	0.0490339	0.0978078	0.311885			stdev	5.96343	1.03516	0.756897	0.00708394
					1.26786
								4A	4G	4U	4C
QS	440.257	7905.83	501.115	121.214		contemporaneous wt		25098.5	1085.19	537.842	134.748
	308.055	9557.66	543.839	104.022		for QS , GQ		16121.6	1158.47	759.969	124.289
	326.923	7418.45	547.885	106.654				20593.7	1092.21	540.239	138.687
	337.243	7636.75		91.312				20351.5	2285.13	585.161	119.602
avg	353.119	8129.68	530.946	105.801			avg	20541.3	1405.25	605.803	129.332
stdev	59.3353	972.637	25.9141	12.2664			stdev	3667.01	587.517	105.056	8.88728
as % of wt : 4A	2.14331	38.4881	2.43958	0.590109			as % of wt : 4A	122.187	5.28302	2.61838	0.655996
	1.49971	46.5297	2.64758	0.506413				78.485	5.63977	3.69976	0.605079
	1.59156	36.1153	2.66728	0.519224				100.257	5.31721	2.63005	0.675173
	1.64181	37.1781		0.444535				99.0773	11.1247	2.84875	0.582261
avg	1.7191	39.5778	2.58481	0.51507			avg	100.002	6.84118	2.94924	0.629627
stdev	0.288863	4.7351	0.126158	0.0597165			stdev	17.8522	2.86022	0.511446	0.0432661
					17.7148
GQ	10686.7	8230.21	2996.62	4290.35
	12787.7	9040.46	3258.53	5679.03
	9167.33	8860.11	3262.91	5484.96
	10368		3471.28	4624.08
avg	10752.5	8710.26	3247.34	5019.6
stdev	1506.33	425.406	194.405	668.244
as % of wt : 4A	52.0261	40.0672	14.5885	20.8867
	62.2547	44.0118	15.8636	27.6473
	44.6294	43.1338	15.8849	26.7025
	50.4749		16.8993	22.5115
avg	52.3463	42.4043	15.809	24.437
stdev	7.33329	2.07101	0.946423	3.25322
					1.30066
								4A	4G	4U	4C
AP	4196.3	258.465	160.196	66.3249		contemporaneous wt		8565.62	704.558	363.913	73.7147
	5145.21	180.577	154.971	73.2218		for AP		7609.47	568.911	253.488	72.541
	5906.13	146.453	178.063	74.603				9511.71	637.865	450.133	63.4014
		182.503	151.919	69.6245					589.186	291.454	69.3932
avg	5082.55	192	161.287	70.9436			avg	8562.27	625.13	339.747	69.7626
stdev	856.636	47.3035	11.6945	3.7262			stdev	951.124	60.342	86.6834	4.61666
as % of wt : 4A	49.0108	3.01875	1.87101	0.774643			as % of wt : 4A	100.042	8.22889	4.25032	0.860952
	60.0935	2.10905	1.80998	0.855195				88.875	6.64461	2.96061	0.847244
	68.9808	1.7105	2.07969	0.871327				111.092	7.44996	5.25734	0.740497
		2.13155	1.77435	0.813181					6.8814	3.40404	0.810478
avg	59.3617	2.24246	1.88376	0.828586			avg	100.003	7.30121	3.96808	0.814793
stdev	10.0051	0.552482	0.136586	0.0435202			stdev	11.1087	0.704765	1.01242	0.0539203
					21.8858
								4A	4G	4U	4C
GG	1188.52	1392.38	1208.56	146.926		contemporaneous wt		43471.9	3849.3	2460.45	222.857
	1553.08	1098.08	864.338	143.611		for GG , NY		41345.6	3216.71	2505.28	289.16
	2121.97	1495.46	996.93	144.481				38758.2	2964.58	2141.45	271.765
	1092.2	1063.41	956.336	156.325				32462.1	3135.73		245.526
avg	1488.95	1262.33	1006.54	147.836			avg	39009.4	3291.58	2369.06	257.327
stdev	466.368	214.329	145.654	5.83069			stdev	4771.52	386.385	198.383	29.1504
as % of wt : 4A	3.04678	3.56938	3.09815	0.376646			as % of wt : 4A	111.441	9.86773	6.30738	0.571296
	3.98134	2.81495	2.21574	0.368149				105.99	8.24607	6.4223	0.741264
	5.4397	3.83364	2.55564	0.370378				99.3572	7.59972	5.48964	0.696672
	2.79988	2.72606	2.45158	0.40074				83.2169	8.03849		0.629409
avg	3.81693	3.23601	2.58028	0.378978			avg	100.001	8.438	6.07311	0.65966
stdev	1.19554	0.549434	0.373384	0.014947			stdev	12.2318	0.990503	0.508558	0.0747273
					1.28983
NY	393.221	152.929	7025.26	112.689
	400.321	157.379	11536.7	118.433
	405.765	141.318	6960.08	111.783
	311.405	144.992	6015.69	122.449
avg	377.678	149.154	7884.42	116.338
stdev	44.4794	7.31749	2478.14	5.02654
as % of wt : 4A	1.00803	0.392035	18.0093	0.288878
	1.02623	0.403443	29.5744	0.303603
	1.04018	0.362269	17.8422	0.286557
	0.798291	0.371689	15.4213	0.313899
avg	0.968182	0.382359	20.2118	0.298234
stdev	0.114023	0.0187585	6.35274	0.0128856
					29.6973
								4A
GP	313.33	136.115	90.7669	55.8799		contemporaneous wt	wt	24386.1
	251.642	132.675	79.4937	52.2632		for GP		17470.1
	170.687	134.637	82.3961	54.0839				23435.9
	201.072	124.926	77.9972	58.2657				22395.4
avg	234.183	132.088	82.6635	55.1231				21282.8
stdev	62.4422	4.97834	5.70259	2.56306				22726.6
								20088.4
as % of wt : 4A	1.42611	0.619521	0.413121	0.254335				23982.9
	1.14534	0.603863	0.361812	0.237873			avg	21971
	0.776875	0.612794	0.375022	0.24616			stdev	2300.71
	0.915172	0.568595	0.355001	0.265194
avg	1.06587	0.601193	0.376239	0.25089
stdev	0.284203	0.0226587	0.0259551	0.0116656			as % of wt : 4A	110.992
					1.69961			79.5146
								106.668
								101.932
								96.8678
								103.439
								91.4316
								109.157
							avg	100
							stdev	10.4716
								4A
AA	6846.14	148.922	156.409	59.9665		contemporaneous wt		21282.8
	5982.54	146.812	151.867	48.8029		for AA , SP, ST		22726.6
	5481.7	139.831	165.271	50.4879				20088.4
	5196.69	143.3	191.682	55.2927				23982.9
avg	5876.77	144.716	166.307	53.6375			avg	22020.2
stdev	723.291	3.99779	17.8088	5.03619			stdev	1695.73
as % of wt : 4A	31.0906	0.676303	0.710303	0.272328			as % of wt : 4A	96.6522
	27.1686	0.666722	0.689678	0.22163				103.209
	24.8942	0.63502	0.75055	0.229282				91.2282
	23.5999	0.650772	0.870491	0.251102				108.914
avg	26.6883	0.657204	0.755255	0.243585			avg	100.001
stdev	3.2847	0.0181553	0.0808754	0.022871			stdev	7.70086
					29.6277
SP	2947.75	4873.55	121.843	63.6756
	3282.93	5682.5	116.059	63.9037
	2518.7	6262.89	103.272	73.5185
	2804.64	5238.31	114.143	56.3645
avg	2888.51	5514.31	113.829	64.3656
stdev	317.74	598.725	7.76203	7.03522
as % of wt : 4A	13.3867	22.1324	0.553327	0.289172
	14.9089	25.8061	0.527063	0.290208
	11.4382	28.4418	0.46899	0.333872
	12.7368	23.7889	0.518363	0.25597
avg	13.1176	25.0423	0.516936	0.292305
stdev	1.44296	2.71901	0.0352499	0.0319492
					30.9454
ST	5991.42	13690.7	375.304	74.2755
	6116.08	11989.7	324.034	72.1345
	6942.93	12507	338.491	70.6889
	4829.51	13037.8	407.984	74.874
avg	5969.98	12806.3	361.453	72.9932
stdev	869.696	728.523	37.791	1.93469
as % of wt : 4A	27.209	62.174	1.70438	0.337309
	27.7751	54.449	1.47154	0.327586
	31.5301	56.7984	1.5372	0.321021
	21.9324	59.2089	1.85279	0.340027
avg	27.1116	58.1576	1.64148	0.331486
stdev	3.94957	3.30846	0.171621	0.00878605
					29.4773
								4A
GV	2065.22	1008.3	890.649	75.6438		contemporaneous wt	wt	22573
	1996.27	779.977	844.859	76.8741		for GV , GR , NA		20874.5
	1966.8	740.979	528.471	67.4858				19119.9
	1704.7	887.884	619.003					19283.4
avg	1933.25	854.286	720.746	73.3346			avg	20462.7
stdev	157.846	120.015	174.731	5.1024			stdev	1614.19
as % of wt : 4A	10.0925	4.92745	4.35248	0.369662			as % of wt : 4A	110.311
	9.75551	3.81164	4.12872	0.375674				102.011
	9.6115	3.62107	2.58257	0.329794				93.4363
	8.33067	4.33898	3.02499					94.2357
avg	9.44753	4.17479	3.52219	0.358376			avg	99.9986
stdev	0.771375	0.586499	0.853886	0.0249348			stdev	7.88833
					2.43458
GR	71.2879	68.2973	237.373	6111.21
	61.1311	64.057	238.775	6903.09
	59.0997	58.8285	208.194	6409.22
	58.508	59.9937	221.556	7055.36
avg	62.5067	62.7941	226.475	6619.72
stdev	5.96097	4.29916	14.4731	437.025
as % of wt : 4A	0.348375	0.33376	1.16001	29.8647
	0.29874	0.313038	1.16686	33.7345
	0.288812	0.287487	1.01742	31.321
	0.285921	0.293182	1.08272	34.4786
avg	0.305462	0.306867	1.10675	32.3497
stdev	0.0291305	0.0210094	0.0707282	2.13568
					52.8306
NA	223.955	114.224	7338.39	60.8023
	289.003	110.532	7176.61	53.2955
	227.27	101.043	6484.05	47.9746
	198.462	106.53	6912.92	45.5896
avg	234.673	108.082	6977.99	51.9155
stdev	38.4389	5.6473	373.071	6.74357
as % of wt : 4A	1.09444	0.558197	35.8618	0.297133
	1.41232	0.540155	35.0711	0.260448
	1.11064	0.493785	31.6867	0.234446
	0.969858	0.5206	33.7825	0.22279
avg	1.14681	0.528184	34.1005	0.253704
stdev	0.187846	0.0275976	1.82315	0.0329549
					43.613
Notes:
GK variant previously characterized in Wharton et al. (2025), and repeated in Tab 6
SD & SE variants in Tab 4
GS & CR variants in Tab 5
(Figs. 3&4)

## Sheet: 3 specificity for other NREs
beta-galactosidase measurements from three-hybrid RNA-binding experiemnts
all proteins (NTR + RBD)
	RNA:	wt NRE	3C NRE			wt NRE	6C	FBE			wt NRE	2A NRE	8C NRE
protein
wt						19920.9					22264.6
		15874.7				17962.8					18644.2
		17349.8				18008.9					19335
		21314.4				19428.8					19074.9
	avg	18179.6			avg	18830.4				avg	19829.7
	stdev	2813.23			stdev	995.806				stdev	1648.11
AD only			95.969		AD only		72.3772	78.6708		AD only		31.1029	36.4038
			93.6732				58.1649	90.0408				30.1042	30.8079
			82.6154				60.8434	75.5926				27.33	35.0604
			89.8589				65.364	86.9286				27.0377	39.3017
		avg	90.5291			avg	64.1874	82.8082			avg	28.8937	35.3935
		stdev	5.84675			stdev	6.21584	6.7939			stdev	2.01956	3.53236
wt			108.459		wt		2292.84	93.1176		wt		127.901	3037.4
			126.83				1874.99	80.8417				150.666	2172.52
			108.335				2230.39	90.0702				118.869	2201
			110.14				2555.07	90.2857				148.135	2386.67
		avg	113.441			avg	2238.32	88.5788			avg	136.393	2449.4
		stdev	8.96387			stdev	280.103	5.3417			stdev	15.5005	403.338
AA			112.708		AA		144.664	101.443		AA		50.7591	67.2581
			105.512				135.26	100.312				51.1667	62.6802
			97.9395				127.405	90.8707				55.7653	61.2633
			93.1325				150.93	81.1214				49.7888	67.6102
		avg	102.323			avg	139.565	93.4369			avg	51.87	64.7029
		stdev	8.59635			stdev	10.3531	9.48026			stdev	2.6604	3.20953
AP			117.894		AP		2299.33	86.3953		AP		60.5377	1668.6
			96.7388				2292.94	86.1429				41.5695	1166
			89.2317				2003.75	91.6089				59.2547	1214.3
			93.7138				2730.46	92.4871				43.0764	1454.25
		avg	99.3947			avg	2331.62	89.1585			avg	51.1096	1375.79
		stdev	12.7128			stdev	299.504	3.35722			stdev	10.178	232.372
GG			100.579		GG		95.3302	95.9621		GG		35.0333	42.9044
			109.958				90.5172	99.5837				39.3643	44.7743
			102.678				78.6618	100.353				34.4548	43.053
			98.9191				76.9818	98.3726				33.6656	42.0787
		avg	103.033			avg	85.3727	98.5678			avg	35.6295	43.2026
		stdev	4.86557			stdev	8.96405	1.91881			stdev	2.55217	1.13208
GS			104.678		GS		77.6568	91.4934		GS		48.2839	46.5255
			97.1583				100.144	93.8541				23.5601	47
			88.5045				89.6103	91.1519				51.108	44.614
			99.007				92.7061	101.318				38.3037	51.5437
		avg	97.337			avg	90.0294	94.4543			avg	40.3139	47.4208
		stdev	6.70145			stdev	9.35833	4.73077			stdev	12.4467	2.93566
GQ			115.444		GQ		726.973	99.1565		GQ		61.088	295.484
			127.198				861.812	109.193				54.2694	380.759
			130.954				725.271	101.649				53.004	297.173
			124.06				507.365	105.915				55.1946	374.552
		avg	124.414			avg	705.355	103.978			avg	55.889	336.992
		stdev	6.61089			stdev	146.678	4.45788			stdev	3.5804	47.0275
CR			112.417		CR		133.661	98.4068		CR		43.1775	77.7721
			116.697				113.543	112.017				57.0233	75.5857
			104.92				120.759	108.924				44.7482	98.5961
			118.317				212.369	98.3532				45.9459	71.9483
		avg	113.088			avg	145.083	104.425			avg	47.7237	80.9755
		stdev	5.9873			stdev	45.6228	7.09386			stdev	6.30247	11.9901
QS			100.733		QS		74.7357	121.157		QS		46.3476	45.0357
			165.94				73.1905	108.725				35.8625	58.6422
			95.8539				77.771	103.692				45.791	45.3967
			91.663				73.9043	101.877				43.583	45.7331
		avg	113.548			avg	74.9004	108.863			avg	42.896	48.7019
		stdev	35.1245			stdev	2.01524	8.69322			stdev	4.8386	6.63297
RG			122.095		RG		80.4945	101.213		RG		49.3147	43.9846
			107.596				81.122	98.9429				47.0735	51.8062
			118.713				83.2658	105.128				35.2258	33.081
			103.94				84.3803	85.3652				39.8408	47.3254
		avg	113.086			avg	82.3156	97.6621			avg	42.8637	44.0493
		stdev	8.69131			stdev	1.81726	8.58674			stdev	6.50159	7.98353
(Fig. 3)

## Sheet: 4 Figs 4&6 R5 SD & SE mutants
beta-galactosidase measurements from three-hybrid RNA-binding experiemnts
(NTR + RBD) and RBD-only proteins
NTR + RBD							RBD
	4A	4G	4U	4C	selectivity index			4A	4G	4U	4C	selectivity index
wt	15970.7	6835.2					wt	10381.6	686.936
	14776.9	4718.14						8363	832.038
	12333.2	5863.89						6881.14	828.632
	16204.1	3807.81						9654.84	989.203
		3814.02						9763.56	683.593
		4033.25						13803.2	897.651
avg	14821.2	4845.38						11042.4	882.809
stdev	1772.55	1250.02					avg	9984.24	828.695
							stdev	2170.89	111.51
as % of wt : 4A	107.757	46.1184					as % of wt : 4A	103.982	6.88037
	99.7021	31.8342						83.764	8.33371
	83.2146	39.5647						68.9217	8.2996
	109.332	25.692						96.7032	9.90788
		25.7339						97.7921	6.84689
		27.213						138.253	8.9909
avg	100.002	32.6927						110.601	8.84224
stdev	11.9597	8.43413					avg	100.002	8.30023
							stdev	21.7437	1.11689
SD	516.138	13508.2	60.7393	42.0571			SD	226.853	25755.7	57.9408	46.5136
	536.561	13605.3	70.8917	37.36				150.592	20590.4	50.028	40.2566
	666.793	12904	58.3776	35.4472				179.354	21121.8	45.9304	36.4325
	383.983	11685.9	48.6657	45.8467						54.1753	33.9449
avg	525.869	12925.9	59.6686	40.1778			avg	185.6	22489.3	52.0186	39.2869
stdev	115.759	882.919	9.12569	4.68993			stdev	38.5121	2841.21	5.18818	5.47266
as % of wt : 4A	3.48248	91.1425	0.409819	0.283767			as % of wt : 4A	2.27217	257.969	0.580336	0.465882
	3.62028	91.7973	0.47832	0.252075				1.50834	206.234	0.501082	0.403211
	4.49898	87.0658	0.393885	0.239169				1.79642	211.557	0.46004	0.364909
	2.5908	78.8472	0.328357	0.309336						0.542621	0.339993
avg	3.54813	87.2132	0.402595	0.271087			avg	1.85897	225.253	0.52102	0.393499
stdev	0.781047	5.95722	0.0615727	0.0316438			stdev	0.385738	28.4577	0.0519649	0.0548143
					129.458							246.308
p-value G vs. A	0.000102
SE	12720.4	18946	60.4073	38.3148			SE	14514	24636.8	62.9087	56.7046
	13470.9	17743.2	58.0511	48.5395				14526.1	23880.4	48.1938	47.6577
	11751	18516.8	71.166	44.9414				14659	24050.4	51.0922	38.2233
	13390	17729.1	55.3356	50.2347					28987.7	59.416	38.8939
avg	12833.1	18233.7	61.24	45.5076			avg	14566.3	25388.8	55.4027	45.3699
stdev	795.952	600.759	6.93423	5.27872			stdev	80.4837	2421.02	6.90402	8.69336
as % of wt : 4A	85.8269	127.832	0.407579	0.258517			as % of wt : 4A	145.372	246.763	0.630095	0.567955
	90.8906	119.716	0.391681	0.327505				145.493	239.187	0.48271	0.477341
	79.286	124.936	0.48017	0.303228				146.825	240.889	0.51174	0.382845
	90.3449	119.621	0.373359	0.338943					290.341	0.595112	0.389562
avg	86.5871	123.026	0.413197	0.307048			avg	145.897	254.295	0.554914	0.454426
stdev	5.37043	4.05343	0.0467865	0.0356165			stdev	0.806126	24.249	0.0691508	0.0870729
					170.812							251.942
p-value G vs. A	<0.0001
p-values	+ vs - NTR	wt	0.00054
	binding to 4G	SD	0.001278
		SE	0.01052
	-NTR	SD vs. SE	0.204
	binding to 4G
	+NTR	SD vs. SE	< 0.0001
	binding to 4G
	+ vs - NTR	SE	0.02277
	binding to 4A
(Figs. 4 & 6)

## Sheet: 5 Figs 4&7 R5 mutants (+&- NTR)
beta-galactosidase measurements from three-hybrid RNA-binding experiemnts
R5 (NTR + RBD) and RBD-only proteins													= variant in Hs Pum1
all assays contemporaneous
NTR + RBD							RBD
	4A	4G	4U	4C	selectivity index			4A	4G	4U	4C	selectivity index
wt	19108.6	6751.31	3718.14	445.724			wt	22268.4	1416.81	1281.75	180.952
	21647.5	5770.5	3895.17	485.807				21431	1687.04	810.892	127.445
	22846.4	5368.6	4810.06	437.659				25583	1970.96	1085.6	159.801
	20295.6	5441.76		466.485				26339.3	2442.7	1191.84	145.419
avg	20974.5	5833.04	4141.13	458.919			avg	23905.4	1879.38	1092.52	153.404
stdev	1622.7	636.641	586.04	21.6509			stdev	2418.03	438.439	204.152	22.638
as % of wt : 4A	91.1019	32.1874	17.7265	2.12502			as % of wt : 4A	93.1537	5.92684	5.36185	0.756963
	103.206	27.5113	18.5706	2.31612				89.6507	7.05727	3.39214	0.533131
	108.922	25.5952	22.9324	2.08658				107.019	8.24497	4.54131	0.668484
	96.7609	25.944		2.224				110.183		4.98574	0.60832
avg	99.9978	27.8095	19.7432	2.18793			avg	100.002	7.07636	4.57026	0.641725
stdev	7.73637	3.03524	2.79399	0.103222			stdev	10.1152	1.15919	0.854016	0.0947001
					4.55964							19.1869
GS / R	9877.3	9465.32	9640.05	2107.16			GS / R	1329.23	622.908	1913.19	102.697
	10572.4	9100.66	9838.38	2165.34				1131.42	720.688	1203.73	109.602
	10553	9093.97	10338.5	2289.26				1462.67	553.17	1309.26	106.639
	9331.95		11083.3	2420.24				1068.44	660.278	990.21	99.4216
avg	10083.7	9219.98	10225.1	2245.5			avg	1247.94	639.261	1354.1	104.59
stdev	596.323	212.495	643.234	139.06			stdev	181.213	70.1217	395.651	4.45774
as % of wt : 4A	47.0908	45.1267	45.9597	10.046			as % of wt : 4A	5.56047	2.60576	8.0033	0.429605
	50.4046	43.3881	46.9053	10.3234				4.73298	3.0148	5.03547	0.45849
	50.3125	43.3562	49.2897	10.9142				6.11868	2.31403	5.47693	0.446095
	44.4908		52.8406	11.5387				4.46953	2.76209	4.14227	0.415903
avg	48.0747	43.957	48.7488	10.7056			avg	5.22041	2.67417	5.66449	0.437523
stdev	2.84302	1.01309	3.06667	0.662981			stdev	0.758054	0.293335	1.6551	0.0186477
					0.891813							1.82039
p-value A vs. U	0.76
GS / N	267.493	451.801	4547.58	61.4382			GS / N	73.8775	94.8206	357.509	60.6265		X
	279.084	421.347	5799.21	60.5309				76.1116	58.5856	468.534	55.3333
	264.205	394.455	5451.2	50.3323				78.6277	79.331	446.131	50.542
	282.466	435.405	5703.06	50.4737				78.9532	77.4176	354.53	53.4063
avg	273.312	425.752	5375.26	55.6938			avg	76.8925	77.5387	406.676	54.977
stdev	8.82999	24.2941	570.967	6.12076			stdev	2.37749	14.8449	59.2163	4.24971
as % of wt : 4A	1.27529	2.154	21.681	0.292912			as % of wt : 4A	0.309046	0.396656	1.49554	0.253614
	1.33055	2.00881	27.6482	0.288586				0.318392	0.245077	1.95998	0.231472
	1.25962	1.8806	25.9891	0.239963				0.328917	0.331859	1.86627	0.211429
	1.34668	2.07583	27.1898	0.240637				0.330279	0.323855	1.48308	0.223411
avg	1.30304	2.02981	25.627	0.265524			avg	0.321659	0.324362	1.70122	0.229981
stdev	0.0420977	0.115824	2.72213	0.0291812			stdev	0.00994559	0.0620995	0.247715	0.0177775
					16.3379							3.08393
p-value A vs. U	0.000382
CR / R	11387.9	4587.7	2896.44	19477.5			CR / R	1061.36	128.743	189.432	9476.19
	15119.4	3882.43	2876	22063.2				427.302	125.547	127.409	7165.52
	11728.2	4040.92	2619.07	20385				918.128	193.353	103.29	7687.22
	11981.5	3626.83	2994.49	17063.2				1131.53	141.909	154.328	8344.88
avg	12554.3	4034.47	2846.5	19747.2			avg	884.58	147.388	143.615	8168.45
stdev	1727.32	406.361	160.2	2085.44			stdev	317.524	31.4508	36.9807	996.454
as % of wt : 4A	54.2928	21.8722	13.809	92.8603			as % of wt : 4A	4.43991	0.538561	0.792437	39.641
	72.0831	18.5098	13.7116	105.188				1.7875	0.525191	0.532981	29.975
	55.915	19.2654	12.4866	97.1873				3.84074	0.808839	0.432085	32.1574
	57.1228	17.2912	14.2765	81.3502				4.73344	0.593637	0.645589	34.9085
avg	59.8534	19.2347	13.5709	94.1464			avg	3.7004	0.616557	0.600773	34.1705
stdev	8.23514	1.93736	0.763767	9.94249			stdev	1.32827	0.131566	0.154698	4.16839
					2.86983							28.07
p-value C vs. A	0.00181
p-value C vs. G	0.00067
CR / K	265.603	80.3114	192.402	14148.8			CR / K	65.2771	66.251	58.0864	356.867		X
	279.381	79.9013	218.529	12115.9				68.2647	78.0469	65.2797	525.456
	235.683	81.4103	191.303	11242.6				78.4213	78.713	56.6594	459.437
	372.369	70.7472	195.956	9282.51				70.6996	112.625	63.5765	506.534
avg	288.259	78.0925	199.547	11697.4			avg	70.6657	83.909	60.9005	462.074
stdev	58.9657	4.93815	12.809	2018.49			stdev	5.6259	19.9815	4.17311	75.4308
as % of wt : 4A	1.26628	0.382891	0.917293	67.4554			as % of wt : 4A	0.273069	0.277143	0.242988	1.49286
	1.33197	0.380936	1.04185	57.7634				0.285567	0.326488	0.27308	2.1981
	1.12364	0.38813	0.912051	53.5999				0.328054	0.329274	0.237019	1.92193
	1.7753	0.337293	0.934236	44.2551				0.295752	0.471136	0.265955	2.11895
avg	1.3743	0.372312	0.951358	55.7685			avg	0.29561	0.35101	0.254761	1.93296
stdev	0.281124	0.023543	0.0610679	9.62332			stdev	0.0235344	0.0835869	0.017457	0.315544
					42.1317							3.5121
p-value C vs. A	0.00149
p-value CR/R vs. CR/K to 4C	0.001446
(Figs. 4 & 7)

## Sheet: 6 Fig 5 Dm Pum
beta-galactosidase measurements from three-hybrid RNA-binding experiemnts
all proteins (NTR + RBD)
	4A	4G	4U	4C	selectivity index
wt Dm Pum							contemporaneous wt
	37039.5	10021.7	6989.93	753.147			for QS
	30438.7	10453.7	6493.36	728.653
	29860	9935.98	5161.93	725.359
	33254.9	9632.37	6391.76	739.899
avg	32648.3	10011	6259.24	736.764
stdev	3281.66	339.179	776.824	12.5707
as % of wt : 4A	113.451	30.6962	21.41	2.30687
	93.2329	32.0196	19.889	2.23185
avg	91.4605	30.4336	15.8109	2.22176
stdev	101.859	29.5037	19.5778	2.26629
	100.001	30.6633	19.1719	2.25669
	10.0516	1.0389	2.37939	0.0385038
					4.6667
Dm Pum QS	14053.7	24982.2	16424.6	6740.3
	12270.7	27704.2	16989.3	5516.71
	15074.9	30491	16747.4	6983.27
	15078.6	38033.4	16475.6	6800.58
avg	14119.5	30302.7	16659.2	6510.22
stdev	1323.52	5623.12	261.731	670.345
as % of wt : 4A	43.0462	76.52	50.3081	20.6454
	37.5848	84.8573	52.0378	16.8975
	46.1741	93.3931	51.2969	21.3896
	46.1854	116.495	50.4643	20.83
avg	43.2476	92.8164	51.0268	19.9406
stdev	4.0539	17.2235	0.801674	2.05325
					1.46889
									4A	4G	4U	4C
Dm Pum GG	7668.41	11239.8	7119.6	1281.44			contemporaneous wt	wt	14713.8	6011.94	4400.12	329.24
	7426.37	8107.97	5071.58	1273.43			for GG , GK , GQ , NY		17048.1	6830.46	3925.96	390.01
	7677.62	7365.68	5344.86	1322.74					25312.7	6137.53	3301.41	412.395
		8749.8	5720.73	1369.36						6672.96	3798.6	431.818
avg	7590.8	8865.8	5814.19	1311.74				avg	19024.9	6413.22	3856.52	390.866
stdev	142.478	1680.65	910.052	44.0694				stdev	5569.09	399.411	451.599	44.4937
as % of wt : 4A	40.307	59.0789	37.4224	6.73557				as % of wt : 4A	77.3395	31.6002	23.1281	1.73056
	39.0348	42.6174	26.6574	6.69347					89.6089	35.9026	20.6358	2.04999
	40.3554	38.7158	28.0939	6.95263					133.05	32.2603	17.353	2.16765
		45.9911	30.0696	7.19768						35.0747	19.9664	2.26974
avg	39.8991	46.6008	30.5608	6.89484				avg	99.9994	33.7094	20.2708	2.05448
stdev	0.748899	8.83391	4.78346	0.23164				stdev	29.2725	2.0994	2.37371	0.23387
					1.24416
Dm Pum GK	7083.76	2018.63	7126.66	2969.02
	6885.73	2988.74	7502.74	2691.32
	5145.24	2655.35	6032.13	3143.66
	7012.59			2804.07
avg	6531.83	2554.24	6887.18	2902.01
stdev	928.017	492.896	763.993	197.374
as % of wt : 4A	37.234	10.6104	37.4594	15.6059
	36.1931	15.7095	39.4362	14.1462
	27.0446	13.9571	31.7063	16.5238
	36.8599			14.7388
avg	34.3329	13.4257	36.2007	15.2537
stdev	4.87788	2.59078	4.01573	1.03744
					1.26225
Dm Pum GQ	19430	18216.8	12847	15554.2
	21111.3	17024.3	9843.19	14335.1
	14306	16168.9	11078.2	15170.4
	15319.3	12859.6	9205.23	12988.9
avg	17541.7	16067.4	10743.4	14512.2
stdev	3251.5	2297.5	1603.51	1135.92
as % of wt : 4A	102.129	95.7517	67.5271	81.7567
	110.966	89.4836	51.7382	75.3489
	75.1957	84.9876	58.2298	79.7394
	80.5221	67.5932	48.3849	68.2726
avg	92.2033	84.454	56.47	76.2794
stdev	17.0907	12.0762	8.42843	5.97066
					0.694566
Dm Pum NY	1751.27	247.305	9786.31	89.8043
	1982.34	201.564	7134.35	91.9333
	2083.63	217.848	9590.89	81.2981
	1383.84	205.343	8513.83	113.613
avg	1800.27	218.015	8756.34	94.1622
stdev	310.514	20.7298	1217.51	13.7571
as % of wt : 4A	9.20507	1.2999	51.4392	0.472033
	10.4197	1.05947	37.4999	0.483224
	10.952	1.14506	50.412	0.427323
	7.2738	1.07933	44.7507	0.597177
avg	9.46265	1.14594	46.0255	0.494939
stdev	1.63214	0.108961	6.39952	0.0723106
					28.0493
									4A	4G
Dm Pum SD	516.138	13508.2	60.7393	42.0571			contemporaneous wt	wt	15970.7	6835.2
	536.561	13605.3	70.8917	37.36			for SD, SE		14776.9	4718.14
	666.793	12904	58.3776	35.4472					12333.2	5863.89
	383.983	11685.9	48.6657	45.8467					16204.1	3807.81
avg	525.869	12925.9	59.6686	40.1778						3814.02
stdev	115.759	882.919	9.12569	4.68993						4033.25
								avg	14821.2	4845.38
as % of wt : 4A	3.48248	91.1425	0.409819	0.283767				stdev	1772.55	1250.02
	3.62028	91.7973	0.47832	0.252075
	4.49898	87.0658	0.393885	0.239169
	2.5908	78.8472	0.328357	0.309336				as % of wt : 4A	107.757	46.1184
avg	3.54813	87.2132	0.402595	0.271087					99.7021	31.8342
stdev	0.781047	5.95722	0.0615727	0.0316438					83.2146	39.5647
					129.458				109.332	25.692
										25.7339
										27.213
Dm Pum SE	12720.4	18946	60.4073	38.3148				avg	100.002	32.6927
	13470.9	17743.2	58.0511	48.5395				stdev	11.9597	8.43413
	11751	18516.8	71.166	44.9414
	13390	17729.1	55.3356	50.2347
avg	12833.1	18233.7	61.24	45.5076
stdev	795.952	600.759	6.93423	5.27872
as % of wt : 4A	85.8269	127.832	0.407579	0.258517
	90.8906	119.716	0.391681	0.327505
	79.286	124.936	0.48017	0.303228
	90.3449	119.621	0.373359	0.338943
avg	86.5871	123.026	0.413197	0.307048
stdev	5.37043	4.05343	0.0467865	0.0356165
					170.812
(Fig. 5)

## Sheet: 7 Fig 5 Hs Pum1 
	beta-galactosidase measurements from three-hybrid RNA-binding experiemnts
	all proteins (NTR + RBD)
		4A	4G	4U	4C	selectivity index		contemporaneous wt
	wt Hs Pum1	14455.2	5042.56	4257.69	977.299			for Hs Pum1
		13239.9	6276.78	3850.18	930.293			GG , GK , QS , SE , SD , GQ
		15254.7	5479.34	4450.44	928.271
		15874.5	4720.46	3362.93	732.74
	avg	14706.1	5379.79	3980.31	892.151
	stdev	1137.07	674.03	481.685	108.661
	as % of wt : 4A	98.2946	34.2892	28.9521	6.64558
		90.0306	42.6818	26.181	6.32594
		103.731	37.2592	30.2628	6.31219
		107.946	32.0989	22.8677	4.98259
	avg	100	36.5823	27.0659	6.06658
	stdev	7.732	4.58337	3.27543	0.738888
						3.0182
	Hs Pum1 GG	8619.43	10132.8	8543.6	3833.74
		8327.05	6177.3	8681.21	4117.85
		7871.24	7266.74	8514.15	4033.08
		8585.21	8176.93	11799.9
	avg	8350.73	7938.44	9384.71	3994.89
	stdev	345.278	1675.79	1611.75	145.853
	as % of wt : 4A	58.6117	68.9024	58.096	26.0692
		56.6235	42.0053	59.0318	28.0012
		53.524	49.4134	57.8958	27.4247
		58.379	55.6027	80.2384
	avg	56.7845	53.981	63.8155	27.165
	stdev	2.34787	11.3953	10.9598	0.991795
						0.786428
	Hs Pum1 GK	8037.03	3961.92	7254.33	3036.78
		5558.46	3605.64	7967.27	3092.34
		9000.44	3794.41	11957.4	3503.79
		6259.9	4725.4	7296.66	3589.13
	avg	7213.96	4021.84	8618.91	3305.51
	stdev	1583.23	491.102	2249.47	281.311
	as % of wt : 4A	54.6514	26.9409	49.3291	20.65
		37.7973	24.5181	54.177	21.0277
		61.2025	25.8018	81.3094	23.8256
		42.567	32.1325	49.6169	24.4059
	avg	49.0545	27.3483	58.6081	22.4773
	stdev	10.7659	3.33946	15.2963	1.9129
						1.17626
	Hs Pum1 QS	4803.74	14112.4	11501.5	5095.41
		4479.86	14870.6	9366.09	5586.76
		5610.9	13903.3	7900.08	4746.4
		5937.95	13935.8	7695.48	4172.62
	avg	5208.11	14205.5	9115.79	4900.3
	stdev	680.385	452.802	1755.89	595.119
	as % of wt : 4A	32.6652	95.9636	78.2096	34.6485
		30.4628	101.119	63.6889	37.9897
		38.1538	94.5417	53.7201	32.2753
		40.3777	94.7627	52.3288	28.3736
	avg	35.4149	96.5968	61.9869	33.3218
	stdev	4.62658	3.07903	11.94	4.04677
						1.40532
	Hs Pum1 SE	17854.2	23075.2	27.905	23.001
		17862.2	27151.2	30.614	20.932
		16062.9	23157.7	28.985	21.162
		16620.8	21571.3	29.532	22.399
	avg	17100	23738.8	29.259	21.8735
	stdev	904.613	2388.94	1.12827	0.98996
	as % of wt : 4A	121.407	156.91	0.189752	0.156406
		121.462	184.627	0.208174	0.142336
		109.227	157.471	0.197096	0.1439
		113.021	146.684	0.200816	0.152312
	avg	116.279	161.423	0.19896	0.148739
	stdev	6.15132	16.2447	0.00767214	0.00673167
						464.261
	Hs Pum1 SD	1114.25	39972.8	40.153	17.991
		1096.03	37071.5	32.935	21.548
		1080.6	36688.1	34.077	21.04
			34804.1	42.446	23.016
	avg	1096.96	37134.1	37.4027	20.8987
	stdev	16.8447	2136.18	4.61951	2.11181
	as % of wt : 4A	7.57684	271.813	0.273038	0.122338
		7.45296	252.084	0.223956	0.146525
		7.34801	249.477	0.231722	0.143071
			236.666	0.28863	0.156508
	avg	7.45927	252.51	0.254337	0.14211
	stdev	0.114543	14.5259	0.0314124	0.0143602
						636.933
	Hs Pum1 GQ	14607.7	18189.7	12181.5	21072.7
		14243	18036.3	10926.6	17684.2
		15464.4	19575.2	12770.2	18296.7
		15536.6	16486.2	12443.4	22304
	avg	14962.9	18071.8	12080.4	19839.4
	stdev	639.032	1263.56	806.058	2207.56
	as % of wt : 4A	99.3314	123.689	82.8338	143.293
		96.8517	122.646	74.3001	120.252
		105.157	133.111	86.8369	124.417
		105.648	112.105	84.6144	151.666
	avg	101.747	122.888	82.1463	134.907
	stdev	4.34538	8.59212	5.48115	15.0113
						0.733615
										4A
								contemporaneous wt	wt	50249
	Hs Pum1 NY	9527.04	1918.42	35115.3	320.763			for NY		58846.7
		9509.37	2322.75	30734.2	354.849					57156.3
		9927.18	1809.94	39632.8	414.782					58983.4
		11634.4	2566.91	32516.5	470.874					49988.7
	avg	10149.5	2154.5	34499.7	390.317					54631.3
	stdev	1008.57	352.537	3866.12	66.2915					58085.5
										47823.9
									avg	54470.6
	as % of wt : 4A	17.4901	3.5219	64.466	0.58887				stdev	4502.51
		17.4577	4.26419	56.423	0.651446
		18.2247	3.32276	72.7595	0.761474
		21.3589	4.71244	59.695	0.864449				as % of wt : 4A	92.2491
	avg	18.6329	3.95532	63.3359	0.716559					108.033
	stdev	1.85157	0.647201	7.09757	0.121701					104.93
						13.5568				108.284
										91.7713
										100.294
										106.636
										87.7971
									avg	99.9992
									stdev	8.26588
	(Fig. 5)

## Sheet: 8 Fig 5 Hs Pum2
	beta-galactosidase measurements from three-hybrid RNA-binding experiemnts
	all proteins (NTR + RBD)
		4A	4G	4U	4C	selectivity index		contemporaneous wt
	wt Hs Pum2	8672.11	6935.86	6177.84	3661.1			for Hs Pum2
		9126.57	6821.62	5901.05	3643.28			GG , GK , QS , SE , SD , GQ
		7766.95	5926.09	7663.19	3542.85
		10135.7	8068.2	5804.85	3762.6
	avg	8925.33	6937.94	6386.73	3652.46
	stdev	985.127	878.419	865.536	90.0071
	as % of wt : 4A	97.1665	77.7128	69.2195	41.0208
		102.258	76.4327	66.1182	40.8211
		87.0247	66.3987	85.8621	39.6958
		113.565	90.4	65.0403	42.1579
	avg	100.004	77.736	71.56	40.9239
	stdev	11.0378	9.84223	9.69789	1.00848
						0.889049
	Hs Pum2 GG	18937.8	21195.7	20009.2	18454.4
		19810.4	23050.7	24368.4	20674.9
		26157.6	19500	21447.9	18308
		19113.2	20759.1	21929.9	19939.6
	avg	21004.7	21126.4	21938.8	19344.2
	stdev	3455.83	1470.58	1813.56	1153.39
	as % of wt : 4A	212.188	237.486	224.193	206.772
		221.965	258.271	273.035	231.652
		293.082	218.487	240.312	205.131
		214.153	232.595	245.713	223.413
	avg	235.347	236.71	245.813	216.742
	stdev	38.7208	16.477	20.32	12.9232
						0.543727
	Hs Pum2 GK	20449.3	16783.7	19028.8	16057.6
		16479	15404.5	17657.6	16214.8
		13401.1	14529.8	19981.9	15653.6
		18346.1	16186.1	19644.1	14679.8
	avg	17168.9	15726	19078.1	15651.5
	stdev	2989.91	977.189	1025.91	689.545
	as % of wt : 4A	229.123	188.052	213.208	179.917
		184.638	172.6	197.844	181.679
		150.153	162.798	223.887	175.391
		205.559	181.357	220.102	164.48
	avg	192.368	176.202	213.76	175.366
	stdev	33.5004	10.9489	11.4948	7.72599
						0.608019
	Hs Pum2 QS	17647.5	19677.5	17676.3	24217.1
		16127.4	24720.7	16975.5	17422.6
		24916.4	23955.1	16940.6	17409
				20718.1	17783.6
	avg	19563.8	22784.4	18077.6	19208.1
	stdev	4697.38	2717.78	1792.65	3343.88
	as % of wt : 4A	197.732	220.476	198.054	271.341
		180.7	276.983	190.202	195.212
		279.175	268.404	189.811	195.058
				232.136	199.256
	avg	219.202	255.288	202.551	215.217
	stdev	52.6317	30.4514	20.0857	37.4664
						0.611076
	Hs Pum2 SE	4152.47	6320.12	84.3286	51.1846
		4352.38	5725.13	74.4644	57.9031
		4215.56	5199.57	90.588	53.3496
		5153.88	5903.9	78.676	53.1308
	avg	4468.57	5787.18	82.0142	53.892
	stdev	464.427	464.322	7.00023	2.8456
	as % of wt : 4A	46.5263	70.8137	0.944858	0.573497
		48.7661	64.1471	0.834335	0.648774
		47.2332	58.2585	1.01499	0.597755
		57.7465	66.1501	0.881524	0.595303
	avg	50.068	64.8423	0.918927	0.603832
	stdev	5.20366	5.20249	0.0784339	0.0318835
						42.5821
	Hs Pum2 SD	1263.03	5389.44	264.287	51.6145
		1185.89	4940.06	250.384	47.4725
		1434.48	5293.46	249.901	35.5042
		1382.77	5921.28	401.835	49.4502
	avg	1316.54	5386.06	291.602	46.0104
	stdev	112.886	405.777	73.791	7.20543
	as % of wt : 4A	14.1516	60.3858	2.9612	0.578313
		13.2872	55.3508	2.80542	0.531905
		16.0726	59.3105	2.80001	0.397807
		15.4932	66.3449	4.50235	0.554064
	avg	14.7512	60.348	3.26725	0.515522
	stdev	1.26483	4.54652	0.82679	0.0807331
						15.9534
	Hs Pum2 GQ	14989.5	14903.2	14275.3	10742.9
		13119.9	13539.8	12084	13340.3
		13253	13368.4	11694.3	11065.3
			9861.04	10378.8	11567
	avg	13787.5	12918.1	12108.1	11678.9
	stdev	1043.14	2150.61	1618.56	1158.33
	as % of wt : 4A	167.95	166.982	159.948	120.369
		147.001	151.706	135.395	149.471
		148.493	149.786	131.029	123.981
			110.488	116.289	129.603
	avg	154.481	144.741	135.665	130.856
	stdev	11.6878	24.0964	18.1351	12.9785
						0.579622
	(Fig. 5)

## Sheet: 9 Classification of phenotypes
Classification of R5 variant binding phenotypes
% binding to the 4 NREs, normalized to wt : 4A = 100
information from source data elsewhere in the file		NTR + RBD									RBD
						selectivity index	CLASS		comments							selectivity index
		4A	4G	4U	4C						4A	4G	4U	4C
	wt	100.001	30.6633	19.1719	2.25669	4.6667		1 = like wt			100.001	8.438	6.07311	0.65966		14.8529
	AA	87.5731	18.3452	25.0223	1.40393	4.43427	1,3				26.6883	0.657204	0.755255	0.243585		29.6277
	AP	82.1196	25.3572	37.6191	2.62409	2.93481	1,3				59.3617	2.24246	1.88376	0.828586		21.8858
	GP	32.6738	13.1828	8.41037	1.10708	3.43304	1,4				1.06587	0.601193	0.376239	0.25089		1.69961
	ST	68.0234	81.0869	23.488	2.50639	3.1194	1,3				27.1116	58.1576	1.64148	0.331486		29.4773
	SP	63.0304	71.3475	8.00501	0.606112	8.2855	1				13.1176	25.0423	0.516936	0.292305		30.9454
	GG	39.8991	46.6008	30.5608	6.89484	1.24416	2	2 = reduced specificity	~ class 4		3.81693	3.23601	2.58028	0.378978		1.28983
	GQ	92.2033	84.454	56.47	76.2794	0.694566	2				52.3463	42.4043	15.809	24.437		1.30066
	GV	49.4058	59.3658	50.5096	8.28848	1.02897	2				9.44753	4.17479	3.52219	0.358376		2.43458
	GS	48.0747	43.957	48.7488	10.7056	0.891813	2		~ class 4		5.22041	2.67417	5.66449	0.437523		1.82039
	QS	43.2476	92.8164	51.0268	19.9406	1.46889	2,3				1.7191	39.5778	2.58481	0.51507		17.7148
	GK	34.3329	13.4257	36.2007	15.2537	1.26225	2,4				0.88369	0.493796	1.46481	0.534051		nd
	AP	82.1196	25.3572	37.6191	2.62409	2.93481	1,3	3 = NTR-dependent			59.3617	2.24246	1.88376	0.828586		21.8858
	QS	43.2476	92.8164	51.0268	19.9406	1.46889	2,3	modification of specificity			1.7191	39.5778	2.58481	0.51507		17.7148
	AA	87.5731	18.3452	25.0223	1.40393	4.43427	1,3				26.6883	0.657204	0.755255	0.243585		29.6277
	GR	5.8445	4.39331	37.9086	75.437	7.36847	3,5				0.305462	0.306867	1.10675	32.3497		52.8306
	ST	68.0234	81.0869	23.488	2.50639	3.1194	1,3				27.1116	58.1576	1.64148	0.331486		29.4773
	GP	32.6738	13.1828	8.41037	1.10708	3.43304	1,4	4 = NTR-dependent			1.06587	0.601193	0.376239	0.25089		1.69961
	RG	8.29341	10.6362	38.6197	49.9663	2.63959	4	binding			0.442672	0.472716	0.826813	1.16058		1.26786
	GK	34.3329	13.4257	36.2007	15.2537	1.26225	2,4				0.88369	0.493796	1.46481	0.534051		nd
	VL	101.252	0.614495	8.64255	0.971244	63.8517	5	5 = altered specificity			22.0055	0.265785	0.488095	0.259365		41.9032
	SD	3.54813	87.2132	0.402595	0.271087	129.458	5				1.85897	225.253	0.52102	0.393499		246.308
	SE	86.5871	123.026	0.413197	0.307048	170.812	5				145.897	254.295	0.554914	0.454426		251.942
	NA	18.113	7.32062	72.7291	0.400515	9.41949	5				1.14681	0.528184	34.1005	0.253704		43.613
	GR	5.8445	4.39331	37.9086	75.437	7.36847	3,5				0.305462	0.306867	1.10675	32.3497		52.8306
	CR	59.8534	19.2347	13.5709	94.1464	2.86983	5		~ class 3		3.7004	0.616557	0.600773	34.1705		28.07
	NY	9.46265	1.14594	46.0255	0.494939	28.0493	5				0.968182	0.382359	20.2118	0.298234		29.6973

## Sheet: 10 reproducibility
Reproducibility of normalized measurements
raw and normalized
beta-galactosidase measurements from three-hybrid RNA-binding experiemnts
with wild type (NTR + RBD)
	beta-gal					normalized beta gal
	4A	4G	4U	4C		4A	4G	4U	4C
	37039.5	10021.7	6989.93	753.147		113.451	30.6962	21.41	2.30687
	30438.7	10453.7	6493.36	728.653		93.2329	32.0196	19.889	2.23185
	29860	9935.98	5161.93	725.359		91.4605	30.4336	15.8109	2.22176
	33254.9	9632.37	6391.76	739.899		101.859	29.5037	19.5778	2.26629
	14713.8	6011.94	4400.12	329.24		77.3395	31.6002	23.1281	1.73056
	17048.1	6830.46	3925.96	390.01		89.6089	35.9026	20.6358	2.04999
	25312.7	6137.53	3301.41	412.395		133.05	32.2603	17.353	2.16765
		6672.96	3798.6	431.818			35.0747	19.9664	2.26974
	18786.5	4760.08	2027.48	390.322		118.774	30.0947	12.8184	2.46773
	12541.6	3995.22	2236.51	239.463		79.292	25.259	14.1399	1.51396
	16121.8	5655.6	2012.21	322.58		101.927	35.7564	12.7218	2.03945
	15193.2	4826.29	2876.92	177.689		93.227	29.6146	17.6531	1.09032
	17376.9	4107.28	2412.45	194.408		106.627	25.2027	14.803	1.19291
	16320.5	4118.2	2876.75	199.856		100.144	25.2697	17.652	1.22633
	29073.8	8425.56	4931.81	889.372		122.923	35.623	20.8515	3.76024
	20841.1	8246.07	4959.39	659.013		88.1157	34.8642	20.9682	2.78629
	21847.3	6526.53	3739.66	614.75		92.3698	27.594	15.8112	2.59915
	22847.6	8480.6		520.859		96.5991	35.8558		2.20218
	15874.7	6677.79	3331.35	537.904		87.3193	36.7315	18.3243	2.95877
	17349.8	7317.12	3549.27	338.655		95.4337	40.2482	19.5229	1.86279
	21314.4	5780.03	4193.55	510.705		117.241	31.7933	23.0668	2.80916
		6138.88		315.004			33.7672		1.73269
	19108.6	6751.31	3718.14	445.724		91.1019	32.1874	17.7265	2.12502
	21647.5	5770.5	3895.17	485.807		103.206	27.5113	18.5706	2.31612
	22846.4	5368.6	4810.06	437.659		108.922	25.5952	22.9324	2.08658
	20295.6	5441.76		466.485		96.7609	25.944		2.224
avg	21544	6695.54	4001.47	471.414		99.9994	31.4001	18.4928	2.16302
stdev	6350.59	1880.47	1385.11	191.441		13.652	4.16359	3.08259	0.574148
CV	0.294774	0.280853	0.346149	0.4061		0.13652	0.132598	0.166692	0.265439
