# Supplementary material
Source: HighWire-hosted journal article supplement (doi:10.1101/rna.080791.125)

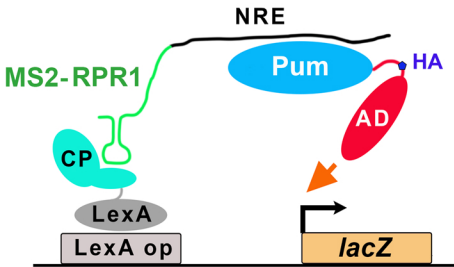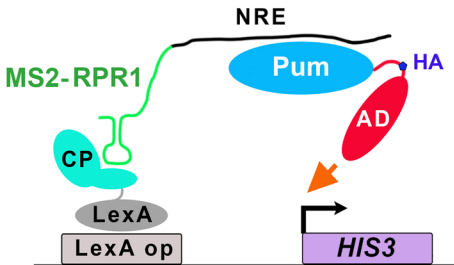

Supplement: Supplemental_Figure_S1.pdf [file Supplemental_Figure_S1.pdf]

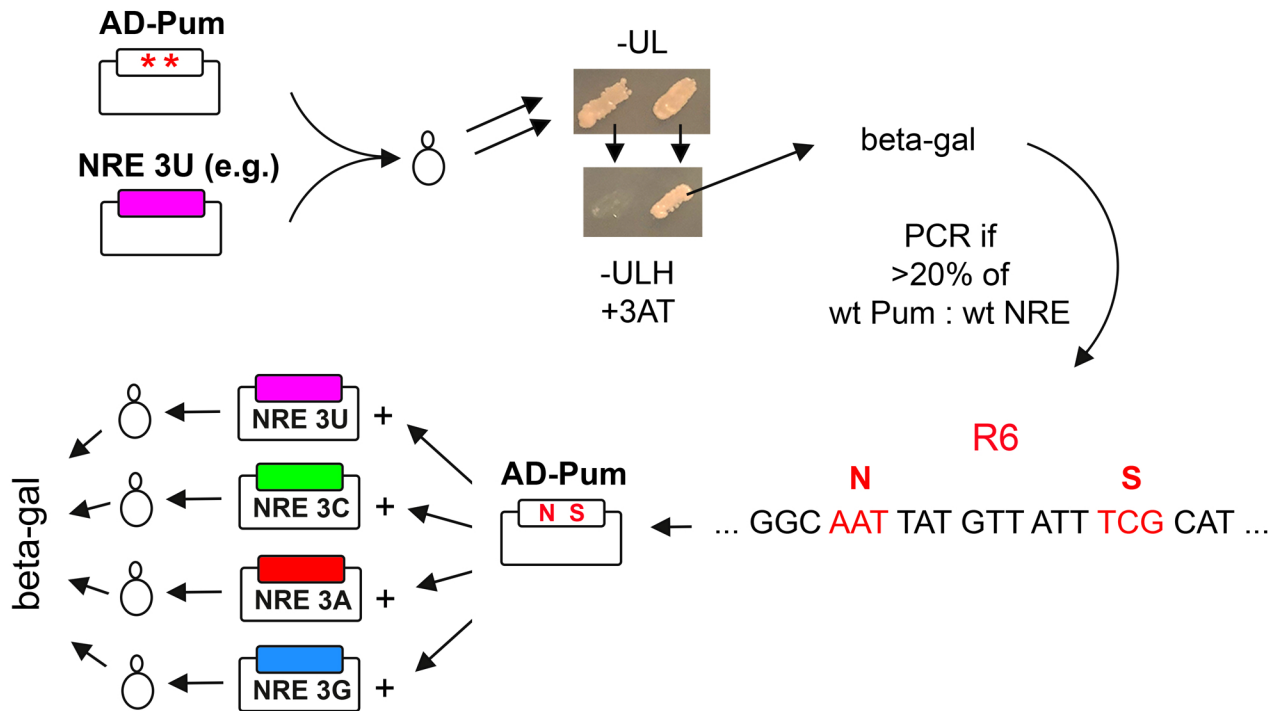

Supplement: Supplemental_Figure_S2.pdf [file Supplemental_Figure_S2.pdf]
